# Supplementary material for: Association between plain ropivacaine dose and spinal hypotension for cesarean delivery: a retrospective study
Source: PeerJ. 2024 Oct 23;12:e18398. doi: 10.7717/peerj.18398 (PMC11512552; doi:10.7717/peerj.18398)
Supplement: Supplemental Information 2 [file peerj-12-18398-s002.xlsx]

## Sheet: Raw data
Number	Maternal age（year）	Maternal weight（kg）	Gestation age（week）	Surgery name	Surgery (0 planned, 1 emergency)	Seniority of anesthesiologists（1 Resident, 2 Resident and attending, 3 attending）	Anesthesia mode（1 Combined spinal-epidural, 2 spinal）	Hypertension disorder complicating pregnancy（0 no, 1 yes）	Pregnancies（0 singleton, 1 multiple）	Anesthesia puncture site（0 L3.4, 1 L2.3）	Ropivacaine dose (mg)	Hypotension occurred (0 no, 1 yes)	Metaraminol, dose (mg)	Ephedrine, dose (mg)	Anesthesia to incision time（min）	Anesthesia to delivery time（min）	Missing data
1	40	70	38	cesarean delivery	0	3	1	0	0	0	18.75	1	0	0	3	8
2	46	72	39	cesarean delivery	0	3	1	0	0	1	17.25	0	0	0	4	19
3	30	55	37	cesarean delivery	0	3	1	0	0	1	16.5	1		6	11	26
4	32	60	39	cesarean delivery	0	2	1	0	0	1	15	0	0	0	5	12
5	33	60	39	cesarean delivery	0	3	1	0	0	1	16.5	0	0	0	5	12
6	41	65	38	cesarean delivery	0	2	1	0	0	1	15	1	0	0	7	16
7	37	63	38	cesarean delivery	0	3	1	0	0	1	15.75	0	0	0	12	24
8	39	62.1	38	cesarean delivery	1	1	1	0	0	0	18.75	1	0	0	16	28
9	32	57	38	cesarean delivery	1	2	1	0	0	1	15	1	0	6	5	18
10	36	80	40	cesarean delivery	1	3	1	0	0	1	17.25	0	0	0	10	22
11	36	65	40	cesarean delivery	0	2	1	0	0	1	15	1	0	0	12	15
12	34	85	38	cesarean delivery	0	2	1	0	0	1	15	1	0	6	8	18
13	35	68	39	cesarean delivery	0	3	1	0	0	0	15.75	1	0	0	7	16
14	30	72.5	41	cesarean delivery	0	3	1	0	0	1	18.75	0	0	0	5	8
15	32	61.8	39	cesarean delivery	0	1	1	0	0	0	18.75	1	0	0	16	29
16	35	82	38	cesarean delivery	0	3	1	0	0	1	18.75	0	0	0	7	19
17	27	75	39	cesarean delivery	1	3	1	0	0	0	18.75	1	0	0	17	27
18	42	60	39	cesarean delivery	1	1	1	0	0	0	15	0	0	0	2	13
19	43	71	39	cesarean delivery	0	3	1	0	0	1	18.75	1	0	6	7	17
20	37	60	40	cesarean delivery	1	3	1	0	0	1	18.75	1	0	6	5	10
21	34	69	39	cesarean delivery	0	3	1	0	0	0	17.25	0	0	0	4	10
22	37	60	41	cesarean delivery	0	2	1	0	0	1	17.25	1	0	6	16	24
23	41	60	34	cesarean delivery	1	3	1	0	0	0	16.5	1	0	0	5	13
24	34	84	37	cesarean delivery	1	3	1	1	0	0	17.25	0	0	0	4	13
25	34	70	38	cesarean delivery	0	3	1	0	0	0	17.25	1	0	0	7	14
26	38	69	40	cesarean delivery	1	2	1	0	0	1	8	0	0	0	5	18
27	35	52	39	cesarean delivery	0	1	1	0	0	0	16.5	1	0	6	12	15
28	36	68	39	cesarean delivery	0	1	1	0	0	0	17.25	1	0	0	13	18
29	32	88	38	cesarean delivery	0	1	1	0	0	1	16.5	1	0	0	16	23
30	41	64.6	38	cesarean delivery	1	3	1	0	0	1	16.5	1	0	0	18	32
31	37	75	40	cesarean delivery	0	2	1	0	0	0	16.5	1	0	6	15	32
32	35	91	38	cesarean delivery	0	3	1	0	0	1	17.25	1	0	6	11	21
33	39	71	38	cesarean delivery	1	3	1	1	0	1	16.5	0	0	0	7	13
34	35	75	40	cesarean delivery	1	2	1	0	0	0	16.5	1	0	6	5	18
35	34	76	38	cesarean delivery	0	3	1	0	0	1	15	0	0	0	8	16
36	33	58	39	cesarean delivery	0	1	1	0	0	1	17.25	1	0	0	12	17
37	33	64.8	38	cesarean delivery	1	1	1	0	0	0	18.75	0	0	0	8	18
38	52	68	37	cesarean delivery	1	3	1	0	0	0	17.25	1	0	0	4	8
39	38	69	38	cesarean delivery	0	2	1	0	0	1	16.5	1	0	12	10	20
40	30	69	39	cesarean delivery	1	2	1	0	0	0	15	0	0	0	10	23
41	35	53	39	cesarean delivery	1	1	1	0	0	0	18.75	1	0	0	10	18
42	32	78	40	cesarean delivery	0	3	1	0	0	1	16.5	0	0	0	13	26
43	23	69	39	cesarean delivery	0	1	1	0	0	0	15	0	0	0	10	15
44	30	62.5	38	cesarean delivery	1	3	1	0	0	0	16.5	0	0	0	10	20
45	36	69	38	cesarean delivery	0	3	1	0	0	0	17.25	1	0	0	13	18
46	35	63.9	39	cesarean delivery	0	1	1	0	0	1	18.75	1	0	5	20	25
47	35	75	40	cesarean delivery	1	3	1	0	0	0	17.25	1	0	0	13	27
48	39	69	37	cesarean delivery	1	3	1	0	0	0	18.75	1	0	0	15	22
49	42	66	38	cesarean delivery	0	2	1	0	0	0	16.5	1	0.5	0	5	9
50	31	70	39	cesarean delivery	0	1	1	0	0	1	18.75	1	0	6	7	12
51	33	61	40	cesarean delivery	1	3	1	0	0	0	17.25	1	0	0	2	7
52	37	58	39	cesarean delivery	0	2	1	0	0	0	16.5	0	0	0	5	8
53	39	66.4	39	cesarean delivery	1	1	1	0	0	1	18.75	1	1	0	6	11
54	32	66	39	cesarean delivery	0	1	1	0	0	1	18.75	1	0.5	0	8	16
55	37	71	37	cesarean delivery	0	3	1	0	0	1	17.25	0	0	0	8	14
56	38	72	38	cesarean delivery	0	3	1	0	0	1	17.25	1	0	0	11	16
57	37	58	38	cesarean delivery	0	3	1	0	0	1	18	1	0	15	10	20
58	34	70	39	cesarean delivery	0	2	1	0	0	0	16.5	1	0	0	5	10
59	46	60	35	cesarean delivery	1	2	1	0	0	1	18.75	1	0.5	0	3	9
60	40	60	38	cesarean delivery	1	2	1	0	0	1	18.75	1	0	6	13	18
61	42	65	38	cesarean delivery	0	2	1	0	0	1	18.75	1	0	0	8	12
62	30	60	38	cesarean delivery	0	2	1	0	0	1	18.75	1	0	6	3	12
63	33	71	39	cesarean delivery	1	1	1	0	0	0	19.5	1	0	6	9	16
64	35	75	70	cesarean delivery	1	2	1	0	0	1	12	0	0	0	15	28
65	36	62	39	cesarean delivery	0	3	1	0	0	1	17.25	0	0	0	7	14
66	40	75	39	cesarean delivery	1	2	1	0	0	0	16.5	0	0	0	10	17
67	44	62	39	cesarean delivery	0	3	1	0	0	1	15	1	1	0	10	20
68	30	70	40	cesarean delivery	1	3	1	0	0	1	18.75	1	1	0	16	27
69	31	68	37	cesarean delivery	0	3	1	0	0	1	18.75	1	0.5	0	15	23
70	42	80	39	cesarean delivery	1	3	1	0	0	0	16.5	0	0	0	7	14
71	39	89	39	cesarean delivery	0	1	1	0	0	1	19.5	1	0.5	0	11	20
72	34	70.5	39	cesarean delivery	0	3	1	0	0	1	17.25	0	0	0	7	11
73	40	76	39	cesarean delivery	0	3	1	0	0	1	18.75	1	0	0	12	21
74	36	65	40	cesarean delivery	1	2	1	0	0	1	18.75	0	0	0	10	16
75	39	70	38	cesarean delivery	0	3	1	0	0	1	17.25	0	0	0	19	32
76	34	68	39	cesarean delivery	0	3	1	0	0	1	17.25	0	0	0	12	17
77	36	53	37	cesarean delivery		3	1	0	0	1	17.25	1	0	0	6	12	Missing data
78	39	78	38	cesarean delivery		3	1	0	0	1	17.25	0	0	0	6	16	Missing data
79	34	65	40	cesarean delivery		3	1	0	0	1	17.25	0	0	0	7	17	Missing data
80	32	71.8	38	cesarean delivery	1	3	1	0	0	1	16.5	0	0	0	5	18
81	38	98	38	cesarean delivery	1	2	1	0	0	0	16.5	1	0	12	14	22
82	38	70	39	cesarean delivery	1	3	1	0	0	1	18.75	1	0	0	8	20
83	31	70	38	cesarean delivery	1	2	1	0	0	1	15	0	0	0	4	18
84	40	62	37	cesarean delivery	0	2	1	0	0	1	19.5	1	0	10	12	17
85	37	84	38	cesarean delivery	0	3	1	0	0	0	18	0	0	0	15	27
86	34	75	39	cesarean delivery	0	2	1	0	0	0	18.75	1	0	0	13	21
87	31	68	37	cesarean delivery	1	3	1	0	0	0	15	0	0	0	10	18
88	42	62	38	cesarean delivery	1	3	1	1	0	1	15	1	0	15	14	19
89	33	60	39	cesarean delivery	0	2	1	0	0	0	16.5	1	0	0	10	22
90	34	70	37	cesarean delivery	0	2	1	0	0	0	16.5	1	0	12	10	23
91	29	74.5	38	cesarean delivery	1	3	1	0	0	1	17.25	0	0	0	10	18
92	40	65	38	cesarean delivery	0	1	1	0	0	0	20.25	1	0	0	22	27
93	32	57	39	cesarean delivery	1	3	1	0	0	1	18	0	0	0	17	20
94	37	86	38	cesarean delivery	1	3	1	0	0	0	16.5	0	0	0	15	24
95	33	68	38	cesarean delivery	0	3	1	0	0	1	17.25	1	0	0	5	10
96	29	75	38	cesarean delivery	1	1	2	0	0	1	20.25	1	0	0	14	26
97	34	64	37	cesarean delivery	1	3	2	0	0	0	17.25	0	0	0	2	4
98	32	111	38	cesarean delivery	0	2	1	0	0	1	16.5	1	0	6	20	42
99	34	60	38	cesarean delivery	0	2	1	0	0	0	10	1	0	0	9	17
100	35	60	41	cesarean delivery	1	2	1	0	0	1	8	0	0	0	12	20
101	30	72	39	cesarean delivery	1	3	1	0	0	0	18	1	0	0	10	15
102	30	70	38	cesarean delivery	1	3	1	0	0	0	16.5	0	0	0	10	15
103	39	65	39	cesarean delivery	1	3	1	0	0	0	17.25	0	0	0	5	18
104	42	74	39	cesarean delivery	1	3	1	0	0	0	15.75	1	0	6	10	18
105	35	65	41	cesarean delivery	1	2	1	0	0	0	16.5	1	0.5	0	10	22
106	31	65	40	cesarean delivery	1	2	1	0	0	0	16.5	0	0	0	10	20
107	41	77	39	cesarean delivery		3	1	0	0	1	16.5	1	1	0	7	12	Missing data
108	28	71	40	cesarean delivery	1	3	1	0	0	1	18	1	0.5	0	5	13
109	33	64	38	cesarean delivery	0	3	1	0	0	1	16.5	1	0.5	0	9	20
110	32	52	37	cesarean delivery	1	2	1	0	0	0	17.25	0	0	0	5	15
111	37	65	37	cesarean delivery	1	2	1	0	0	0	16.5	1	0	0	10	20
112	35	73.5	37	cesarean delivery	0	3	1	0	0	1	17.25	1	0	0	10	23
113	43	65	38	cesarean delivery	0	3	1	0	0	1	17.25	0	0	0	21	31
114	41	62	40	cesarean delivery	1	2	1	0	0	1	18.75	0	0	0	5	8
115	34	69	39	cesarean delivery	1	3	1	0	0	0	15	0	0	0	14	19
116	44	65	39	cesarean delivery	0	1	1	0	0	1	18.75	1	0	0	7	14
117	34	75	38	cesarean delivery	0	2	1	0	0	0	15	1	0	0	5	9
118	35	89	38	cesarean delivery	0	3	1	0	0	1	18	1	0.5	6	11	31
119	38	61	39	cesarean delivery	0	1	1	0	0	1	14	1	0.25	0	21	26
120	40	58	39	cesarean delivery	1	2	1	0	0	0	15	0	0	0	6	14
121	34	80	40	cesarean delivery	1	3	1	0	0	1	16.5	0	0	0	5	10
122	36	71	39	cesarean delivery	0	3	1	0	0	1	16.5	1	0	0	10	25
123	33	60	40	cesarean delivery	1	2	1	0	0	0	15	0	0	0	5	13
124	39	67	38	cesarean delivery	0	2	1	0	0	0	15	1	0	0	10	16
125	33	53	40	cesarean delivery	1	3	1	0	0	0	18	0	0	0	15	23
126	30	101	39	cesarean delivery	0	3	1	0	0	1	17.25	0	0	0	12	21
127	34	75	39	cesarean delivery	0	3	1	0	0	1	17.25	0	0	0	15	20
128	36	64.4	39	cesarean delivery	0	3	1	0	0	0	16.5	0	0	0	5	11
129	35	60	37	cesarean delivery	1	3	1	0	0	1	17.25	0	0	0	8	25
130	32	85	38	cesarean delivery	1	2	1	0	0	0	16.5	1	0.5	0	13	21
131	40	68	38	cesarean delivery	0	2	1	0	0	1	15	1	0	0	9	15
132	41	67	37	cesarean delivery	1	2	1	0	0	1	10	1	0	0	12	22
133	36	60	37	cesarean delivery	1	2	1	0	0	0	10	0	0	0	5	10
134	42	70	38	cesarean delivery	1	1	1	0	0	1	17.25	1	0.25	6	15	20
135	38	85	41	cesarean delivery	1	2	1	0	0	1	17.25	0	0	0	5	13
136	34	59	38	cesarean delivery	1	3	1	0	0	1	17.25	0	0.5	0	13	22
137	45	71	38	cesarean delivery	0	3	1	1	0	0	17.25	1	0	0	16	25
138	36	75.1	38	cesarean delivery	1	2	1	0	0	0	15.75	0	0	0	14	18
139	29	90	39	cesarean delivery	1	2	1	0	0	0	16.5	0	0	0	15	24
140	35	65	39	cesarean delivery	1	1	1	0	0	0	17.25	1	0	6	15	22
141	36	65	38	cesarean delivery	1	2	1	0	0	0	16.5	1	0.25	0	17	25
142	40	60	39	cesarean delivery	1	1	1	0	0	1	17.25	1	0	6	6	12
143	35	75	38	cesarean delivery	1	1	1	0	0	1	16.5	1	0	15	10	17
144	31	72	41	cesarean delivery	1	3	1	0	0	1	15	1	0	6	22	27
145	38	83	37	cesarean delivery	1	3	1	0	0	0	17.25	1	0	0	14	19
146	36	65.8	38	cesarean delivery	0	3	1	0	0	1	15.75	1	0	6	13	23
147	33	67	39	cesarean delivery	1	3	1	0	0	0	16.5	0	0	0	8	13
148	35		40	cesarean delivery	0	3	1	0	0	1	16.5	1	0.5	0	3	15	Missing data
149	35	65	39	cesarean delivery	0	3	1	0	0	0	20.5	1	0	0	9	15
150	46	68.3	38	cesarean delivery	1	1	1	0	0	1	17.25	0	0	0	11	18
151	36	48	38	cesarean delivery	0	2	1	0	0	0	16.5	0	0	0	4	11
152	35	68	39	cesarean delivery	1	3	1	0	0	0	16.5	0	0	0	9	15
153	45	83	38	cesarean delivery	1	2	1	0	0	0	16.5	0	0	0	10	19
154	39	75	41	cesarean delivery	1	2	1	0	0	1	15	1	0	10	21	34
155	40	77	39	cesarean delivery	0	1	2	0	0	1	17.25	0	0	0	20	27
156	34	70	39	cesarean delivery	0	1	1	0	0	1	17.25	1	0	0	14	22
157	34	72	39	cesarean delivery	0	1	1	0	0	1	17.25	1	0	0	16	22
158	31	80	38	cesarean delivery	0	2	1	0	0	1	16.5	1	0	12	10	22
159	36	65	38	cesarean delivery	1	2	1	0	0	0	16.5	0	0	0	5	10
160	31	80	37	cesarean delivery	1	3	1	0	0	1	16.5	1	0	12	5	12
161	42	62.5	38	cesarean delivery	0	3	1	0	0	1	15.75	0	0	0	11	21
162	37	70	38	cesarean delivery	1	2	1	0	0	1	15	1	0	0	11	19
163	39	76	39	cesarean delivery	0	3	1	0	0	1	15.75	1	0	0	22	35
164	37	90	39	cesarean delivery	1	3	1	0	0	1	17.25	1	0	0	12	18
165	34	81.2	39	cesarean delivery	0	3	1	0	0	1	15.75	0	0	0	10	19
166	34	58.8	39	cesarean delivery	1	3	1	0	0	1	16.5	1	0.5	0	8	12
167	33	56.6	39	cesarean delivery	1	3	1	0	0	0	16.5	0	0	0	6	11
168	45	87	39	cesarean delivery	0	3	1	0	0	1	17.25	0	0	0	13	22
169	35	71	38	cesarean delivery	0	3	1	0	0	1	17.25	1	0.5	0	10	17
170	35	59.8	39	cesarean delivery	0	1	1	0	0	1	18.75	1	0.5	5	14	25
171	33	70	38	cesarean delivery	1	2	1	0	0	0	17.25	1	0	6	10	13
172	31	75	38	cesarean delivery	1	3	1	0	0	1	16.5	1	0	0	5	8
173	35	83.8	36	cesarean delivery	0	3	1	0	0	1	17.75	1	0	0	4	9
174	43	70	39	cesarean delivery	0	3	1	0	0	1	15.75	1	0	0	4	18
175	37	65	39	cesarean delivery	0	2	1	0	0	1	18.75	1	0	6	9	15
176	36	65	41	cesarean delivery	1	2	1	0	0	0	15	0	0	0	7	13
177	35	60.4	39	cesarean delivery	1	1	1	0	0	1	17.75	1	0.5	0	10	14
178	36	61	38	cesarean delivery	0	3	1	0	0	1	17.25	1	0.5	0	11	21
179	39	73	39	cesarean delivery	0	3	1	0	0	1	17.25	1	0.5	0	9	20
180	33	97	39	cesarean delivery	1	2	1	0	0	1	16.5	0	0	0	10	20
181	35	75	37	cesarean delivery		3	1	1	0	0	15	1	0	0	15	34	Missing data
182	28	65	39	cesarean delivery	1	2	1	0	0	1	16.5	0	0	0	10	17
183	35	65	39	cesarean delivery	1	3	1	0	0	1	18	0	0	0	8	24
184	37	75	39	cesarean delivery	0	2	1	0	0	1	18	1	0	0	8	19
185	34	56.8	40	cesarean delivery	0	3	1	0	0	1	16.5	0	0	0	2	12
186	28	60	38	cesarean delivery	0	1	1	0	0	1	17.25	1	0.25	0	20	26
187	36	75	38	cesarean delivery	0	2	1	0	0	0	16.5	1	0	6	8	17
188	34	90	40	cesarean delivery	1	3	1	0	0	1	17.25	1	0	6	10	15
189	33	58	38	cesarean delivery	0	1	1	1	0	1	16.5	1	0	6	12	17
190	28	60	38	cesarean delivery	1	2	1	0	0	0	16.5	0	0	0	12	21
191	35		40	cesarean delivery	1	3	1	0	0	1	16.5	1	0	0	5	14	Missing data
192	36	62	38	cesarean delivery	1	3	1	0	0	0	16.5	0	0	0	20	37
193	33	96	38	cesarean delivery	0	2	1	0	0	0	16.5	1	0	12	10	27
194	35	60	38	cesarean delivery	1	2	1	0	0	0	10	0	0	0	18	25
195	36	72	36	cesarean delivery	1	3	1	0	0	1	18	1	1	0	10	26
196	35	70	39	cesarean delivery	1	3	1	0	0	0	18.75	1	1	0	12	22
197	32	75	38	cesarean delivery	1	3	1	0	0	1	15.75	1	0	6	10	16
198	34	65	39	cesarean delivery	0	2	1	0	0	1	15	0	0	0	5	18
199	31	84	39	cesarean delivery	0	2	1	0	0	0	16.5	1	0	0	10	21
200	34	68	39	cesarean delivery	0	3	1	0	0	1	18	1	0	0	22	28
201	30	77.2	39	cesarean delivery	0	3	1	0	0	1	18	1	0.5	0	11	27
202	38	91	39	cesarean delivery	0	3	1	0	0	1	15.75	1	0	10	21	31
203	37	71	38	cesarean delivery	1	3	1	0	0	1	17.23	0	0	0	9	21
204	28	84	40	cesarean delivery	1	3	1	0	0	1	15	1	0	0	12	34
205	37	60	39	cesarean delivery	0	3	1	0	0	1	17.25	1	0	0	11	25
206	29	89	40	cesarean delivery	1	1	1	0	0	0	17.25	1	0	6	2	6
207	28	85	35	cesarean delivery	1	1	1	0	1	0	18.75	1	0.25	12	15	19
208	39	65	39	cesarean delivery	1	3	1	0	0	1	17.25	0	0	0	9	14
209	33	64	40	cesarean delivery	0	2	1	0	0	1	15	1	0.25	0	5	11
210	31	80	39	cesarean delivery	1	2	1	0	0	1	15	1	0	6	17	22
211	34	70	39	cesarean delivery	0	2	1	0	0	0	16.5	0	0	0	19	25
212	42	84	39	cesarean delivery	0	2	1	0	0	0	16.5	1	0	0	23	26
213	46	89	38	cesarean delivery	0	2	1	0	0	0	16.5	1	0	0	18	25
214	30	75	39	cesarean delivery	0	2	1	0	0	0	16.5	1	0.5	0	8	11
215	40	70	41	cesarean delivery	1	3	1	0	0	1	15.75	0	0	0	17	21
216	32	65	38	cesarean delivery	1	3	1	0	0	1	15.75	0	0	0	20	26
217	44	63	38	cesarean delivery	0	2	1	0	0	0	16.5	0	0	0	20	24
218	35	86	40	cesarean delivery	1	2	1	0	0	0	16.5	0	0	0	22	27
219	35	65	38	cesarean delivery	0	2	1	0	0	0	16.5	1	0	12	15	21
220	31	77	38	cesarean delivery	1	3	1	0	0	1	17.25	0	0	0	12	17
221	35	60.9	39	cesarean delivery	0	3	1	0	0	1	18	1	1	0	10	24
222	30	64	39	cesarean delivery	1	3	1	0	0	1	18	1	0	0	4	10
223	35	60.6	39	cesarean delivery	0	1	1	0	0	1	18.75	1	0	0	22	32
224	41	68	39	cesarean delivery	0	1	1	1	0	1	18.75	1	1	0	17	23
225	46	62	39	cesarean delivery	0	1	1	0	0	1	20.5	1	0.5	0	4	18
226	43		39	cesarean delivery	1	3	1	0	0	0	16.5	0	0	0	9	18	Missing data
227	28	55	39	cesarean delivery	1	2	1	0	0	0	16.5	1	0.5	0	15	19
228	32	60	40	cesarean delivery	1	2	1	0	0	1	15.75	0	0	0	8	13
229	33	62	39	cesarean delivery	0	1	1	0	0	1	18	1	0	6	9	16
230	38	55.4	37	cesarean delivery	1	3	1	0	0	0	16.5	0	0	0	5	10
231	35	85	39	cesarean delivery	0	2	1	0	0	0	16.5	0	0	0	15	27
232	34	70	39	cesarean delivery	1	3	1	0	0	0	17.25	0	0	0	10	14
233	33	58.4	39	cesarean delivery	0	1	1	0	0	1	20.5	1	0.5	0	8	15
234	36	62	39	cesarean delivery	0	1	1	0	0	1	20.5	1	0.5	0	19	27
235	32	85	40	cesarean delivery	1	2	1	0	0	0	16.5	1	0.5	0	15	16
236	45	66.5	38	cesarean delivery	1	3	1	0	0	1	18	1	0.5	0	10	18
237	30	73	35	cesarean delivery	1	3	1	0	0	0	18	1	0.5	0	20	26
238	38	79.7	34	cesarean delivery	1	3	1	0	0	0	16.5	1	0	0	10	14
239	42	60.5	38	cesarean delivery	0	2	1	0	0	1	17.25	1	0	0	9	12
240	37	90	38	cesarean delivery	0	2	1	0	0	1	16.5	1	0	15	10	16
241	31	77	39	cesarean delivery	0	3	1	0	0	1	15.75	1	0.5	0	20	30
242	41	68	38	cesarean delivery	0	1	1	0	0	1	16.5	1	0.5	0	15	20
243	46	48	39	cesarean delivery	0	1	1	0	0	0	17.25	1	0.5	0	10	16
244	33	87	39	cesarean delivery	0	1	1	0	0	0	18	1	0.5	0	9	16
245	46	74	38	cesarean delivery	0	1	1	1	0	1	19.5	1	0.5	0	5	16
246	31	64	39	cesarean delivery	0	2	1	0	0	0	16.5	1	0.1	0	15	23
247	29	70	38	cesarean delivery	1	3	1	0	0	1	15.75	1	0	6	8	15
248	41	63	39	cesarean delivery	0	2	1	0	0	0	16.5	1	0.1	0	15	20
249	37	56	39	cesarean delivery	0	1	1	0	0	1	18.75	1	1	0	15	23
250	45	66	35	cesarean delivery		3	1	0	0	1	17.25	1	0.25	0	15	21	Missing data
251	37	54	38	cesarean delivery	1	3	1	0	0	1	17.25	1	0	6	7	14
252	37	65	38	cesarean delivery	0	3	1	0	0	1	17.25	1	0	0	11	15
253	40	60	39	cesarean delivery	0	3	1	0	0	1	16.5	1	0	6	13	24
254	30	77.8	39	cesarean delivery	1	3	1	0	0	0	16.5	1	0	6	10	18
255	37	85	36	cesarean delivery	1	2	1	1	0	0	16.5	1	0.1	0	10	21
256	34	75.5	39	cesarean delivery	0	3	1	0	0	1	17.25	1	0	6	15	23
257	35	60.5	40	cesarean delivery	1	3	1	0	0	1	15.75	1	0.1	0	10	13
258	26	79.1	39	cesarean delivery	1	1	2	0	0	1	20.25	1	0.5	0	11	15
259	35	60	39	cesarean delivery	0	1	1	0	0	1	19.5	1	0.5	0	10	15
260	38	70	38	cesarean delivery	1	2	1	0	0	0	16.5	1	0.1	12	15	19
261	32	68	39	cesarean delivery	0	3	1	0	0	1	15.75	1	0.3	0	5	13
262	38	88	38	cesarean delivery	0	1	1	0	0	1	18	1	0.2	0	20	28
263	39	68	38	cesarean delivery	0	3	1	0	0	1	17.25	1	0	10	9	20
264	38	75.5	38	cesarean delivery	0	3	1	0	0	0	18.75	0	0	0	12	20
265	26	75.5	39	cesarean delivery	1	1	1	0	0	1	20.25	1	0.5	0	5	12
266	36	63	38	cesarean delivery	1	3	1	0	0	1	15.75	1	0.5	0	12	21
267	44	78	36	cesarean delivery		3	1	1	0	1	18	1	0.25	0	12	20	Missing data
268	40	99	39	cesarean delivery	0	1	1	0	0	1	16.5	1	0.25	6	15	19
269	37	62	39	cesarean delivery	0	1	1	0	0	1	16.5	1	0.25	0	14	22
270	40	75	40	cesarean delivery	1	2	1	0	0	1	16.5	1	1	0	10	15
271	33	63.5	39	cesarean delivery	1	1	1	0	0	1	16.5	1	0.5	0	15	23
272	39	68.9	39	cesarean delivery	1	1	1	0	0	1	16.5	1	1	0	16	23
273	31	76.3	39	cesarean delivery	1	1	1	0	0	1	16.5	0	0.5	0	17	22
274	42	65	38	cesarean delivery	1	3	1	0	0	0	17.25	1	0	6	10	23
275	36	71	39	cesarean delivery	0	2	1	0	0	0	16.5	0	0.1	0	15	18
276	37	65	38	cesarean delivery	0	2	1	0	0	0	16.5	0	0.1	0	18	29
277	36	82	39	cesarean delivery	0	2	1	0	0	0	16.5	1	0	12	4	8
278	27	44.8	37	cesarean delivery	1	2	1	0	0	0	14.5	1	0	0	17	22
279	35	65	37	cesarean delivery	1	2	1	0	0	1	15	1	0	6	11	21
280	30	65	39	cesarean delivery	1	2	1	0	0	0	16.5	1	0.1	0	10	14
281	41	75.8	38	cesarean delivery	0	3	1	0	0	1	15	1	0	10	9	15
282	35	70	37	cesarean delivery	0	2	1	1	0	1	15.75	1	0	0	20	29
283	33	65	38	cesarean delivery	1	2	1	0	0	0	16.5	1	0	0	20	25
284	38	70	37	cesarean delivery	1	2	1	0	0	1	17.25	1	0.25	0	10	17
285	32	63	39	cesarean delivery	1	2	1	0	0	1	16.5	1	0.1	0	3	20
286	34	64.5	38	cesarean delivery	1	3	1	0	0	1	17.25	1	0	0	10	17
287	35	65	38	cesarean delivery	0	3	1	0	0	1	16.5	1	0.5	0	19	25
288	30	90	40	cesarean delivery	0	3	1	0	0	1	17.25	1	0.5	0	18	25
289	43	73	38	cesarean delivery	0	1	1	0	0	0	17.25	1	0.2	0	19	27
290	38	67	38	cesarean delivery		3	1	0	0	1	17.25	0	0	0	12	25	Missing data
291	31	69	38	cesarean delivery	1	2	1	0	0	1	18	1	1	0	12	23
292	31	67	38	cesarean delivery	0	1	1	0	0	1	17.25	0	0	0	13	25
293	39	70	39	cesarean delivery	1	2	1	0	0	0	16.5	1	0.1	0	18	23
294	42	74	37	cesarean delivery	0	3	1	0	0	1	16.5	1	0	0	16	25
295	34	90	39	cesarean delivery	0	3	1	0	0	1	16.5	1	0.3	0	12	24
296	31	73	40	cesarean delivery	1	2	1	0	0	1	17.25	1	0	0	10	17
297	29	70	38	cesarean delivery	1	3	1	0	0	1	15.75	0	0	0	10	20
298	37	67	38	cesarean delivery	0	3	1	0	0	1	17.25	0	0	0	12	25
299	38	70	39	cesarean delivery	1	2	1	0	0	0	16.5	1	0.1	0	10	16
300	36	70.8	39	cesarean delivery	1	1	1	0	0	1	16.5	1	0.5	0	17	23
301	32	68	38	cesarean delivery	1	3	1	0	0	1	17.25	0	0	0	14	19
302	34	70	35	cesarean delivery	1	3	1	0	0	0	18	1	0	0	15	20
303	40	68	41	cesarean delivery	0	3	1	0	0	0	15.75	1	0	6	15	22
304	30	58.5	38	cesarean delivery	0	3	1	0	0	1	15.75	1	2	0	2	10
305	33	63.5	39	cesarean delivery	0	3	1	0	0	0	15.75	0	0	0	21	27
306	32	69	36	cesarean delivery	1	2	1	0	0	0	16.5	1	0.1	0	7	14
307	32	64.4	40	cesarean delivery	1	3	1	0	0	0	16.5	1	0	0	15	22
308	34	68	39	cesarean delivery	0	3	1	0	0	1	15	1	0	6	10	23
309	40	69.3	39	cesarean delivery	0	1	1	0	0	1	18.75	1	1	0	12	19
310	33	72	39	cesarean delivery	1	2	1	0	0	0	16.5	0	0	0	7	12
311	30	92	40	cesarean delivery	1	3	1	0	0	0	16.5	0	0	0	8	22
312	37	80	39	cesarean delivery	1	3	1	0	0	1	18	1	0.5	0	12	29
313	33	68	38	cesarean delivery	1	3	1	0	0	0	16.5	1	1	0	11	17
314	30	60	38	cesarean delivery	0	3	1	0	0	0	16.5	1	0.5	0	11	18
315	35	72.5	39	cesarean delivery	0	1	1	0	0	1	17.25	1	0.5	0	15	27
316	45	70	39	cesarean delivery	0	2	1	0	0	0	16.5	0	0.5	0	23	30
317	30	90	40	cesarean delivery	1	3	1	0	0	0	15.75	0	0	0	13	19
318	29	56	38	cesarean delivery		1	1	0	0	1	17.25	1	0	6	15	21	Missing data
319	31	65	40	cesarean delivery	1	1	1	0	0	0	17.25	1	0.5	6	12	20
320	36	77	40	cesarean delivery	0	3	1	0	0	1	17.25	0	0	0	16	29
321	31	80	39	cesarean delivery	0	3	1	0	0	1	16.5	0	0	0	18	30
322	37	71.5	39	cesarean delivery	1	2	1	0	0	1	10	1	0.25	0	22	27
323	37	65	38	cesarean delivery	1	1	1	0	0	1	16.5	1	0.25	0	14	23
324	33	60	40	cesarean delivery	1	2	1	0	0	1	16.5	1	1	0	8	25
325	36	58	39	cesarean delivery	0	3	1	0	0	1	17.25	1	0	0	12	27
326	25	90	40	cesarean delivery	0	3	1	0	0	1	17.25	1	0.5	0	33	41
327	30	70	39	cesarean delivery	1	2	1	0	0	0	16.5	1	0.5	0	5	13
328	35	64.2	37	cesarean delivery	0	3	1	0	0	1	16.5	1	0	0	10	18
329	26	71	37	cesarean delivery	0	3	1	0	1	0	15	1	1	0	10	17
330	27	65	37	cesarean delivery	1	2	1	0	0	0	16.5	0	0	0	15	21
331	29	65	39	cesarean delivery	0	2	1	0	0	0	16.5	1	1	0	12	17
332	34	63	39	cesarean delivery	0	3	1	0	0	1	16.5	1	0.3	0	8	14
333	31	82	39	cesarean delivery	1	3	1	0	0	1	15.75	1	1	0	15	24
334	29	74	39	cesarean delivery	1	1	1	0	0	0	18.75	1	0.25	0	10	14
335	36	70	40	cesarean delivery	0	2	1	0	0	0	16.5	1	0.3	0	10	15
336	37	72	38	cesarean delivery	0	2	1	0	0	0	16.5	0	0	0	17	23
337	40	55	38	cesarean delivery	1	2	1	0	0	1	15	1	0.25	0	17	25
338	30	65	41	cesarean delivery	1	1	1	0	0	1	17.25	0	0.25	0	11	16
339	32	66	39	cesarean delivery	0	1	1	0	0	1	17.25	1	0.25	0	17	30
340	28	62	39	cesarean delivery		3	1	0	0	0	17.25	0	0	0	8	18	Missing data
341	36	65	38	cesarean delivery	0	2	1	0	0	0	16.5	1	1	0	8	18
342	43	96	36	cesarean delivery	1	2	1	0	0	0	15	1	1	0	10	28
343	33	88	38	cesarean delivery	0	3	1	0	0	0	15	0	0	0	17	26
344	40	64	37	cesarean delivery	1	3	1	0	0	0	16.5	0	0	0	8	16
345	35	51	40	cesarean delivery	1	3	1	0	0	0	16.5	1	0.5	10	12	23
346	33	71	40	cesarean delivery	1	3	1	0	0	0	15	0	0	0	15	28
347	38	68	39	cesarean delivery	1	1	1	0	0	1	18	1	0.25	0	20	27
348	28		38.5	cesarean delivery	1	1	1	0	0	1	18.75	1	0.2	0	5	11	Missing data
349	37	90	38	cesarean delivery	1	3	1	0	0	1	16.5	1	0.5	0	10	15
350	37	56	38	cesarean delivery	0	1	1	0	0	0	15	0	0	0	23	40
351	36	67	36	cesarean delivery	1	3	1	0	0	1	16.5	1	0	0	7	18
352	44	55	38	cesarean delivery	1	1	1	0	0	0	15	1	0.3	0	18	33
353	36	65.3	39	cesarean delivery	0	3	1	0	0	1	16.5	0	0	0	10	15
354	44	70	40	cesarean delivery	0	3	1	0	0	1	18.75	1	1	0	10	15
355	39	66	38	cesarean delivery	1	2	1	0	0	1	10	1	0.5	0	20	28
356	31	56	38	cesarean delivery	0	1	1	0	0	1	16.5	1	0.5	0	15	25
357	42	60	40	cesarean delivery	0	1	1	0	0	1	17.25	1	0.25	0	18	23
358	28	82	38.5	cesarean delivery		3	1	0	0	1	17.25	0	1	0	32	36	Missing data
359	32	61.7	38	cesarean delivery	1	3	1	0	0	1	15.75	1	0	0	7	15
360	35	65	37	cesarean delivery	0	2	1	0	0	1	17.25	1	0	0	4	9
361	35	64.5	39	cesarean delivery	0	1	1	0	0	1	17.25	1	0.5	0	16	24
362	28	87	40	cesarean delivery	1	3	1	0	0	1	16.5	1	0.5	0	7	12
363	28	63	38	cesarean delivery	0	2	1	0	0	1	16.5	1	1	0	12	17
364	27	66	41	cesarean delivery	1	2	1	0	0	1	15.75	1	0.3	0	7	16
365	37	66	39	cesarean delivery	1	2	1	0	0	0	15.75	1	0.3	0	8	16
366	41	80	36	cesarean delivery	1	1	1	0	0	0	17.25	0	0	0	28	40
367	29	86	39	cesarean delivery	1	3	1	0	0	1	17.25	0	0	0	7	18
368	40	77	39	cesarean delivery	1	1	1	0	0	0	17.25	1	0.5	0	19	26
369	46	63	39	cesarean delivery	1	1	1	0	0	1	15.75	1	0.5	0	14	24
370	32	70	39	cesarean delivery	1	2	1	0	0	1	15	1	0.25	0	7	12
371	35	67.9	39	cesarean delivery	1	3	1	0	0	0	15.75	1	0	0	14	19
372	38	72.5	39	cesarean delivery	1	1	1	0	0	0	19.5	1	0.5	0	14	16
373	29	77.1	39	cesarean delivery	0	1	1	0	0	1	17.25	1	0.5	0	11	15
374	39		36	cesarean delivery	1	3	1	0	0	0	18.75	0	0	0	9	16	Missing data
375	37	70	39	cesarean delivery	0	2	1	0	0	0	16.5	1	0.5	0	10	15
376	44	78.9	39	cesarean delivery	1	1	1	0	0	1	16.5	1	0.5	0	11	17
377	28	66	40	cesarean delivery	1	2	1	0	0	1	15.75	1	0.3	0	5	12
378	40	70	38	cesarean delivery	0	2	1	0	0	0	15	0	0	0	12	22
379	44	60	40	cesarean delivery	1	2	1	0	0	0	16.5	1	0.5	6	8	13
380	39	68	39	cesarean delivery	0	1	1	0	0	1	17.25	1	0.5	0	17	24
381	36	101	39	cesarean delivery	0	3	1	0	0	0	15.75	1	0	12	24	31
382	34	65.2	39	cesarean delivery	0	3	1	0	0	1	15.75	1	0	0	21	29
383	45	73	39	cesarean delivery	0	3	1	0	0	1	15.75	1	0	0	13	20
384	38	93.4	39	cesarean delivery	1	2	1	0	0	1	15.75	1	1	0	10	15
385	34	90	39	cesarean delivery		2	1	1	0	1	17.25	1	0	0	10	15	Missing data
386	39	67	39	cesarean delivery	0	2	1	0	0	1	18.75	1	0.5	0	19	24
387	37	62.3	38	cesarean delivery	0	1	1	0	0	1	18.75	0	0.5	0	11	16
388	28	82.6	39	cesarean delivery	0	1	1	0	0	1	20.25	1	0.5	0	6	13
389	28	67	39	cesarean delivery	1	3	1	0	0	1	17.25	0	0	0	10	13
390	37	66	38	cesarean delivery	1	3	1	0	0	1	16.5	1	0.5	0	10	17
391	38	63	38	cesarean delivery	0	3	1	0	0	1	17.25	1	0	0	11	17
392	43	95	37	cesarean delivery	1	1	1	0	0	1	17.25	1	0.25	0	10	18
393	43	78	39	cesarean delivery	1	3	1	0	0	1	17.25	1	0	0	8	17
394	30		37	cesarean delivery	0	3	1	0	0	0	15.75	0	0	0	7	12	Missing data
395	27	67	40	cesarean delivery	1	3	1	0	0	0	15.75	0	0	0	10	17
396	30	60	38	cesarean delivery	1	3	1	0	0	0	15.75	1	0	0	9	13
397	31	65	37	cesarean delivery	1	3	1	0	1	0	15.75	0	0	0	7	18
398	35	64	38	cesarean delivery	0	3	1	0	0	1	15	1	0.5	0	12	20
399	33	70	37	cesarean delivery	1	1	1	1	0	1	15.75	1	0.5	0	12	16
400	36	75	37	cesarean delivery	1	2	1	0	0	1	16.5	1	0.5	0	20	31
401	38	65	39	cesarean delivery	0	2	1	0	0	0	16.5	1	1	0	8	22
402	28	71	39	cesarean delivery	1	2	1	0	0	1	16.5	0	0	0	7	10
403	33	82	38	cesarean delivery	0	2	1	0	0	0	15.75	0	0	0	9	20
404	31	85	36	cesarean delivery	0	3	1	0	0	1	16.5	1	0.5	0	28	32
405	39	66.3	39	cesarean delivery	1	3	1	0	0	1	15.75	1	0.5	0	12	18
406	36	66	39	cesarean delivery	1	2	1	0	0	0	16.5	1	1	0	8	19
407	36	59.3	38	cesarean delivery	1	1	1	0	0	0	18	1	1	0	15	20
408	37	75	39	cesarean delivery	0	3	1	0	0	1	17.25	1	0.5	0	18	24
409	37	75	39	cesarean delivery	0	2	1	0	0	1	17.25	0	0	0	7	13
410	32	65	40	cesarean delivery	1	2	1	0	0	0	16.5	0	0	0	11	16
411	37	82	39	cesarean delivery	1	1	1	0	0	1	12	1	0.25	0	10	17
412	40	97.5	38	cesarean delivery	0	3	1	0	0	0	15.75	1	0.25	0	10	23
413	35	66	38	cesarean delivery	0	2	1	0	0	1	16.5	1	0.25	0	6	13
414	42	63.7	38	cesarean delivery	1	3	1	0	0	1	17.25	1	0	0	11	21
415	29	70	37	cesarean delivery	1	1	1	0	0	0	17.25	1	0.5	0	13	24
416	34	80	38	cesarean delivery	1	1	1	0	0	1	16.5	1	0.5	0	12	18
417	33	60.7	38	cesarean delivery	1	1	1	0	0	0	17.25	1	0	0	12	17
418	33	56.5	40	cesarean delivery	1	2	1	0	0	0	18.75	0	0	0	10	12
419	29	80	35	cesarean delivery	1	1	1	1	0	1	16.5	1	0	0	23	27
420	38	65	38	cesarean delivery	0	1	1	0	0	1	18	1	0	0	19	24
421	29	50	41	cesarean delivery	1	2	1	0	0	1	15.75	0	0.3	0	12	16
422	45	60	39	cesarean delivery	0	2	1	0	0	1	15.75	1	0.25	0	9	15
423	37	73.5	39	cesarean delivery	1	1	1	0	0	1	16.5	1	0.5	0	18	27
424	35		38	cesarean delivery	0	3	1	0	0	1	17.25	1	0	0	13	24	Missing data
425	39		36	cesarean delivery	1	2	1	0	0	1	18.75	0	0	0	15	21	Missing data
426	30		39	cesarean delivery	1	3	1	0	0	0	15.75	1	0	5	8	12	Missing data
427	37	50	35	cesarean delivery		1	1	0	0	1	17.25	0	0	0	9	14	Missing data
428	34	65	39	cesarean delivery	0	2	1	0	0	1	17.25	0	0	0	16	22
429	34	73	37	cesarean delivery	1	3	1	0	0	1	18.75	1	0	0	16	24
430	36	66	40	cesarean delivery	1	3	1	0	0	0	18.75	1	0	6	7	13
431	29	75	39	cesarean delivery	1	2	1	0	0	1	15	1	0	0	6	15
432	28	70	40	cesarean delivery	1	3	1	0	0	0	17.25	0	0	0	3	12
433	41	65	39	cesarean delivery	1	1	1	0	0	0	16.5	1	0.5	0	10	27
434	30	64.8	40	cesarean delivery	1	3	1	0	0	0	18.75	1	0	6	11	20
435	32	70	37	cesarean delivery	1	2	1	0	0	1	16.5	1	0.5	0	15	28
436	32	60	37	cesarean delivery	1	3	1	0	0	0	18	1	0	0	12	20
437	34	70	39	cesarean delivery	1	2	1	0	0	0	18	0	0	0	10	16
438	43	65	38	cesarean delivery	1	2	1	0	0	1	18	1	0	0	10	21
439	37	65	37	cesarean delivery	1	2	1	0	0	0	18	1	0	0	15	22
440	43	80	38	cesarean delivery	0	1	1	0	0	1	18	1	1	0	14	23
441	32	50	38	cesarean delivery	0	3	1	0	0	1	12	1	0.5	0	8	20
442	29	95	39	cesarean delivery		3	1	0	0	1	16.5	0	0	0	10	23	Missing data
443	29	68	37	cesarean delivery	0	2	1	0	0	0	18	1	0.5	0	10	20
444	28	63	39	cesarean delivery	1	3	1	1	0	1	15	1	0	0	12	17
445	29	68		cesarean delivery	1	2	1	0	0	0	16.5	1	0	0	19	25	Missing data
446	32	69	39	cesarean delivery	0	1	1	0	0	1	16.5	1	0.5	0	38	46
447	37	95	40	cesarean delivery	1	2	1	0	0	1	15.75	1	0	0	10	17
448	29		39	cesarean delivery	1	3	1	0	0	0	16.5	1	1	0	6	11	Missing data
449	29	75	38	cesarean delivery	1	2	1	0	0	0	16.5	0	0	0	32	36
450	34	81	39	cesarean delivery	0	1	1	0	0	1	16.5	1	0	0	12	22
451	31	71.5	38	cesarean delivery	1	3	1	1	0	1	16.5	1	0	0	13	20
452	34	62.5	39	cesarean delivery	0	3	1	0	0	1	17.25	1	0	0	25	32
453	37	86	38	cesarean delivery		2	1	0	0	1	16.5	0	0	0	15	27	Missing data
454	31	72	38	cesarean delivery		2	1	0	0	1	15	1	0.5	0	11	16	Missing data
455	36	53.4	40	cesarean delivery		2	1	0	0	1	15	0	0	0	14	18	Missing data
456	40	59	38	cesarean delivery	1	3	1	0	0	1	17.25	0	0	0	11	16
457	33	65	38	cesarean delivery	1	2	1	0	0	1	17.25	0	0	0	9	15
458	41	80	39	cesarean delivery	0	1	1	0	0	1	18	1	0.5	0	14	23
459	39	59.5	39	cesarean delivery	0	2	1	0	0	0	16.5	1	0	0	15	23
460	25	68	39	cesarean delivery	0	1	1	0	0	1	17.25	0	0	0	20	25
461	32	66	38	cesarean delivery	0	1	1	0	0	1	15.75	1	0	0	16	23
462	38	113	39	cesarean delivery	0	3	1	0	0	0	18	1	2	0	12	30
463	32	60	39	cesarean delivery	1	3	1	0	0	1	18	1	0.5	0	11	15
464	32	68	37	cesarean delivery	1	3	1	0	0	1	16.5	1	0.5	0	10	14
465	37	73	39	cesarean delivery	0	1	1	0	0	1	18	1	0.25	0	18	24
466	27	66	41	cesarean delivery	0	2	1	0	0	1	15.75	1	0.3	0	4	9
467	34	81	38	cesarean delivery	0	2	1	0	0	0	17.25	1	0	12	5	20
468	29	60	36	cesarean delivery		3	1	0	0	0	17.25	1	0.2	0	10	15	Missing data
469	45	75	38	cesarean delivery		3	1	0	0	1	18.75	1	1	0	10	19	Missing data
470	32	76	39	cesarean delivery	0	1	1	0	0	0	18.75	1	0.5	0	15	21
471	33	72	38	cesarean delivery	0	3	1	0	0	1	17.25	0	0	0	9	17
472	32	75	39	cesarean delivery	0	2	1	0	0	0	16.5	0	1	0	8	22
473	37	76	39	cesarean delivery	0	1	1	0	0	0	16.5	1	0.5	0	20	26
474	29	75	41	cesarean delivery	1	3	1	0	0	1	15	1	0	0	5	14
475	41	55	39	cesarean delivery	1	2	1	0	0	1	18	1	0.25	0	5	8
476	36	75	38	cesarean delivery	1	2	1	0	0	0	10	1	0.25	0	12	23
477	39	70	38	cesarean delivery	1	1	1	0	0	1	18	1	0.25	0	15	22
478	38	69.9	38	cesarean delivery	0	3	1	0	0	1	17.25	0	0	0	11	17
479	30	89	39	cesarean delivery	1	3	1	0	0	1	16.5	1	0.5	0	11	15
480	28	78.9	40	cesarean delivery	1	3	1	0	0	0	16.5	0	0	0	6	11
481	44	71	39	cesarean delivery	0	3	1	0	0	0	16.5	0	0	0	5	9
482	40	75	38	cesarean delivery	0	2	1	0	0	1	10	0	0	0	14	18
483	28	91.6	38	cesarean delivery	0	3	1	0	0	1	16.5	1	0	0	12	19
484	36	78	38	cesarean delivery	0	3	1	0	0	1	15.75	1	0.5	0	10	17
485	37	64	39	cesarean delivery	1	1	1	0	0	0	17.25	1	0.5	0	10	15
486	32	77	40	cesarean delivery	1	3	1	0	0	1	18	1	0.5	0	12	17
487	30	61.6	34	cesarean delivery	0	3	1	0	0	1	17.25	1	0	0	15	20
488	30	62	40	cesarean delivery	1	3	1	0	0	1	15	0	0	0	9	16
489	34	90	39	cesarean delivery	1	3	1	0	0	1	15	0	0	0	10	17
490	38	68	38	cesarean delivery	1	3	1	0	0	0	15.75	1	0.5	0	7	12
491	31	82	39	cesarean delivery	1	3	1	0	0	1	18	1	0.5	0	12	28
492	30	77.3	39	cesarean delivery	1	3	1	0	0	1	18	1	1	0	12	32
493	33	59	38	cesarean delivery	1	2	1	0	0	1	18	0	0.25	0	18	26
494	30	72.5	39	cesarean delivery	1	3	1	0	0	1	17.25	1	0	0	11	18
495	38	78.9	38	cesarean delivery	1	2	1	0	0	0	15	1	0	0	12	19
496	36	64.6	38	cesarean delivery	0	3	1	0	0	1	15	0	0	0	9	18
497	35	75	38	cesarean delivery	0	2	1	0	0	0	10	1	0.25	0	20	26
498	32	72	38	cesarean delivery	0	3	1	0	0	0	15.75	0	0	0	20	32
499	33	66	39	cesarean delivery	1	1	1	0	0	0	17.25	1	1	0	15	29
500	30	58	37	cesarean delivery	1	3	1	0	0	1	15	1	0	0	8	13
501	29	70	40	cesarean delivery	0	3	1	0	0	1	16.5	1	1	0	17	26
502	39	68	67	cesarean delivery		2	1	0	0	0	15	0	0	0	9	19	Missing data
503	33	72	41	cesarean delivery	1	3	1	0	0	0	16.5	1	0.5	0	5	9
504	36	63	37	cesarean delivery	0	3	1	1	0	1	16.5	0	0	0	20	39
505	31	85	39	cesarean delivery	0	3	1	0	0	1	16.5	1	1	0	20	28
506	43	83	37	cesarean delivery	1	2	1	0	0	1	16.5	1	1	0	14	21
507	32	82	39	cesarean delivery	0	3	1	0	0	1	17.25	1	0.5	0	7	11
508	38	70	38	cesarean delivery	0	3	1	0	0	1	17.25	1	0.5	0	13	24
509	39	70	38	cesarean delivery	1	1	1	0	0	1	16.5	1	0.5	0	20	26
510	18	58	41	cesarean delivery	1	3	1	0	0	0	15	0	0	0	20	32
511	31	72.5	39	cesarean delivery	0	1	1	0	0	0	18	1	0	0	14	23
512	32	56	38	cesarean delivery	0	3	1	0	0	1	15.75	1	0	0	12	21
513	36	68.5	38	cesarean delivery	0	3	1	0	0	0	15	1	0	6	17	22
514	26	77.6	37	cesarean delivery	0	3	1	0	0	1	16.5	1	0	0	10	21
515	27	65.3	38	cesarean delivery	0	1	1	0	0	0	18	1	0.5	0	15	24
516	35	83	39	cesarean delivery	0	3	1	0	0	0	16.5	1	0	15	10	17
517	36	77	38	cesarean delivery	0	3	1	0	0	0	16.5	1	0	6	7	15
518	33	83	39	cesarean delivery	0	3	1	0	0	1	15.75	0	0	0	11	16
519	37	64	39	cesarean delivery	1	3	1	0	0	0	17.25	1	0.5	0	20	27
520	29	66.9	38	cesarean delivery	1	1	1	0	0	0	17.25	1	0.5	0	17	23
521	42	66	39	cesarean delivery	1	1	1	0	0	0	17.25	1	0.5	0	17	37
522	38	105	39	cesarean delivery	0	3	1	0	0	0	15	1	0.25	0	20	27
523	34	70.6	38	cesarean delivery	0	1	1	0	0	1	15	1	0.25	6	23	31
524	37	79	39	cesarean delivery	0	1	1	0	0	0	18	1	0	0	15	23
525	46	70	34	cesarean delivery	1	2	1	1	0	0	10	1	0.25	0	9	15
526	37	75.6	38	cesarean delivery	1	1	1	0	0	1	16.5	1	0	0	30	36
527	32	84	39	cesarean delivery	0	3	1	0	0	1	17.25	0	0	0	18	25
528	34	85	39	cesarean delivery	0	3	1	0	0	1	17.25	1	0.25	0	10	15
529	41	80	38	cesarean delivery	1	2	1	0	0	1	16.5	1	0.5	0	9	22
530	30	49	37	cesarean delivery	1	3	1	0	0	0	16.5	0	0.5	0	9	16
531	35	62.5	38	cesarean delivery	0	3	1	0	0	1	16.5	1	1	0	20	34
532	29	58	38	cesarean delivery	0	2	1	0	0	1	15	0	0	0	10	18
533	42	68	39	cesarean delivery	0	3	1	0	0	1	16.5	0	0	0	12	20
534	35	65	39	cesarean delivery	0	2	1	0	0	0	16.5	1	1	0	12	16
535	33	71	39	cesarean delivery	1	1	1	0	1	1	16.5	0	0	0	9	28
536	27	63	40	cesarean delivery	1	3	1	0	0	0	15	1	0	0	19	27
537	35	77	35	cesarean delivery	1	3	1	1	0	0	16.5	0	0	0	9	18
538	34	61.8	39	cesarean delivery	1	2	1	0	0	0	18.75	1	0	0	5	14
539	40	55	40	cesarean delivery	0	1	1	0	0	0	18.75	1	0.25	0	18	22
540	42	69	39	cesarean delivery	0	1	1	0	0	0	20.25	1	0.5	0	12	19
541	33	51	40	cesarean delivery	1	2	1	0	0	0	16.5	1	1	0	8	15
542	38	67	38	cesarean delivery	1	2	1	0	0	0	16.5	0	0	0	15	25
543	31	60	38	cesarean delivery	0	1	1	0	0	1	18.75	1	0.5	0	10	18
544	32	65	39	cesarean delivery	0	1	1	0	0	1	18.75	1	0.5	0	7	16
545	42	61	38	cesarean delivery	0	3	1	0	0	0	15.75	1	0.3	0	10	15
546	30	59	38	cesarean delivery	0	3	1	0	0	0	15	1	0	6	10	15
547	34	67	41	cesarean delivery	1	3	1	0	0	0	15	1	0	0	10	17
548	35	70	39	cesarean delivery	1	2	1	0	0	0	18	1	0.5	0	14	18
549	28	82.5	37	cesarean delivery	1	1	1	0	0	0	17.25	1	0.5	0	7	18
550	33	83	38	cesarean delivery	0	1	1	0	0	0	15.75	0	0	0	28	36
551	31	71	39	cesarean delivery	0	2	1	0	0	0	16.5	0	0	0	15	20
552	32	80	39	cesarean delivery	0	2	1	0	0	0	15	0	0	0	5	16
553	43	74	37	cesarean delivery	1	3	1	0	0	1	16.5	1	0.5	0	9	30
554	28	90	37	cesarean delivery	0	1	1	0	1	0	13.5	0	0	0	18	25
555	40	75	39	cesarean delivery	0	1	1	0	0	0	13.5	1	0	6	15	26
556	35	57.4	39	cesarean delivery	1	1	1	0	0	1	18.75	0	0	0	5	9
557	37	70	38	cesarean delivery	0	2	1	0	0	1	16.5	1	0.5	0	10	21
558	35	50	38	cesarean delivery	0	3	1	0	0	1	17.25	1	0	0	11	19
559	38	65	40	cesarean delivery	0	3	1	0	0	1	18.75	1	0.5	0	17	21
560	35	65	37	cesarean delivery	1	3	1	0	0	0	16.5	0	0	0	11	15
561	32	68	68	cesarean delivery	1	3	1	0	0	1	13.5	0	0	0	8	14
562	38	93	36	cesarean delivery	0	3	1	0	0	1	17.25	0	0	0	7	12
563	39	73	36	cesarean delivery	1	3	1	0	0	1	17.25	1	0.5	0	12	20
564	44	82.3	39	cesarean delivery	0	3	1	1	0	0	19.5	1	0	0	8	20
565	36	68.2	39	cesarean delivery	1	3	1	1	0	0	16.5	1	0	0	15	17
566	32	69	38	cesarean delivery	0	3	1	0	0	0	15	1	0	6	5	10
567	40	70	38	cesarean delivery	0	2	1	1	0	1	15	1	0	0	15	20
568	28	81	37	cesarean delivery	1	2	1	0	0	1	16.5	1	0.5	0	15	27
569	34	64	38	cesarean delivery	1	1	1	0	0	1	16.5	1	0.5	0	13	22
570	42	66	39	cesarean delivery	1	2	1	0	0	1	16.5	1	1	0	15	23
571	41	88.5	35	cesarean delivery	0	3	1	0	0	1	15.75	1	0	6	8	18
572	28	72.5	34	cesarean delivery	0	2	1	0	0	1	16.5	1	1	0	8	17
573	35	76	39	cesarean delivery	0	1	1	0	0	1	18.75	1	1	0	6	15
574	25	78	39	cesarean delivery	0	1	1	0	0	0	20.25	1	1	0	15	25
575	36	82	39	cesarean delivery	1	1	1	0	0	0	20.25	1	0.5	0	7	18
576	29	77	39	cesarean delivery	0	2	1	0	0	0	16.5	1	0	6	8	15
577	36	75	38	cesarean delivery	0	1	1	0	0	1	16.5	1	0.5	0	11	20
578	31	89	38	cesarean delivery	0	3	1	0	0	0	18.75	1	0.5	0	13	26
579	31	69	39	cesarean delivery	0	1	1	0	0	1	18.75	1	0.5	0	14	20
580	29	78	34	cesarean delivery	1	3	1	1	0	0	18	1	1	0	20	33
581	40	84	40	cesarean delivery	1	2	1	0	0	0	16.5	0	1	0	25	28
582	31	65.5	39	cesarean delivery	0	1	1	0	0	0	16.5	0	0	0	10	18
583	34	76	40	cesarean delivery	0	2	1	0	0	1	18.75	0	0	0	6	11
584	41	73	38	cesarean delivery	1	3	1	0	0	0	16.5	0	0	0	11	24
585	30	61.5	39	cesarean delivery	1	1	1	0	0	0	16.5	1	0.5	6	12	19
586	44	68.3	37	cesarean delivery	1	2	1	0	0	1	18.75	1	0.5	0	10	26
587	42	61	39	cesarean delivery	1	2	1	0	0	0	16.5	0	0	0	5	16
588	34	81	38	cesarean delivery	1	3	1	0	0	0	16.5	0	0	0	14	22
589	38	57	39	cesarean delivery	0	2	1	0	0	0	18.75	1	0	0	8	18
590	38	63	40	cesarean delivery	1	3	2	0	0	1	16.5	1	0.5	0	9	13
591	42	86.3	39	cesarean delivery	1	2	1	1	0	0	18.75	1	0	0	13	14
592	32	70	40	cesarean delivery	1	1	1	0	0	0	13.5	0	0	0	20	26
593	37	72.5	39	cesarean delivery	0	2	1	0	0	0	16.5	1	1	0	6	10
594	31	68.8	38	cesarean delivery	1	2	1	0	0	1	18.75	1	0	0	7	11
595	29	57	38	cesarean delivery	1	2	1	0	0	1	16.5	1	0.5	0	10	17
596	31	70	36	cesarean delivery	1	1	1	0	0	1	16.5	1	0.25	0	15	21
597	36	57.5	39	cesarean delivery	1	1	1	0	0	1	16.5	1	0.25	0	26	34
598	30	93	39	cesarean delivery	1	1	1	0	0	0	20.25	1	1	0	13	14
599	33	81.8	39	cesarean delivery	1	3	1	0	0	0	17.25	1	0.5	0	11	22
600	38	78.5	39	cesarean delivery	1	3	1	0	0	0	18	1	0	0	7	24
601	30	68.5	40	cesarean delivery	1	3	1	0	0	0	18.75	1	0.5	0	10	15
602	38	72	39	cesarean delivery	1	2	1	0	0	1	18.75	1	0	10	10	18
603	26	77.6	40	cesarean delivery	1	3	1	0	0	1	16.5	1	1	0	20	34
604	44	61.4	39	cesarean delivery	0	1	1	0	0	0	20.25	1	1	6	8	13
605	36	56	41	cesarean delivery	1	3	1	0	0	1	15.75	1	0	6	7	12
606	31	85	39	cesarean delivery	1	2	1	0	0	0	16.5	0	0	0	23	30
607	37	70	37	cesarean delivery	1	1	1	1	0	0	18	0	0	0	15	22
608	31	74	40	cesarean delivery	1	2	1	0	0	0	18.75	1	0	0	15	21
609	30	66.9	39	cesarean delivery	1	3	1	0	0	0	18	1	0	6	10	14
610	27	79	39	cesarean delivery	1	1	1	1	0	0	18	0	0	0	10	15
611	35	75	38	cesarean delivery	0	3	1	0	0	0	18.75	1	0.5	0	7	15
612	50		37	cesarean delivery	1	3	2	0	0	0	18.75	1	0	0	3	11	Missing data
613	30	52	39	cesarean delivery	0	1	1	0	0	1	16.5	1	0.5	0	15	19
614	32	89	37	cesarean delivery	0	1	1	1	0	1	16.5	0	0.5	0	14	24
615	40	67.4	39	cesarean delivery	1	2	1	0	0	0	19.5	1	0.5	0	3	15
616	31	68	37	cesarean delivery	0	2	1	0	0	0	16	1	0	6	5	10
617	37	81	38	cesarean delivery	0	3	1	0	0	1	17.25	1	1	0	20	29
618	34	85	40	cesarean delivery	1	2	1	0	0	1	16.5	0	0	0	5	10
619	33	86	39	cesarean delivery	0	3	1	1	0	1	18	1	0	6	19	25
620	26	73.5	39	cesarean delivery	0	3	1	0	0	1	18	1	0.25	0	10	12
621	29	68	39	cesarean delivery	1	3	1	1	0	1	16.5	1	0	0	7	9
622	34	99.4	37	cesarean delivery	1	2	1	1	0	1	16.5	1	0.5	0	11	18
623	33	79.5	39	cesarean delivery	1	1	1	1	0	0	17.25	1	0	0	12	16
624	30	72	39	cesarean delivery	1	1	1	0	0	1	16.5	1	0.5	0	9	13
625	34	68	39	cesarean delivery	0	3	1	0	0	1	16.5	0	0	0	12	24
626	38	62	40	cesarean delivery	1	3	1	0	0	1	16.5	1	0.25	0	10	18
627	34	65.5	39	cesarean delivery	0	1	1	0	0	0	20.25	1	1	0	8	17
628	30	75	39	cesarean delivery	0	2	1	0	0	1	15	0	0	0	20	31
629	32	76	39	cesarean delivery	1	2	1	0	0	0	18	0	0	0	10	14
630	31	60	39	cesarean delivery	1	1	1	0	0	0	20.25	1	1	0	4	15
631	31	65	39	cesarean delivery	1	1	1	0	0	1	18.75	0	0	0	9	17
632	39	71.4	39	cesarean delivery	0	3	1	0	0	1	16.5	1	0.5	0	28	36
633	25	60.5	40	cesarean delivery	1	3	1	0	0	1	12.75	1	1	0	20	25
634	34	51.6	39	cesarean delivery	0	2	1	0	0	1	16.5	0	1	0	21	33
635	34	74	39	cesarean delivery	1	3	1	0	0	1	18.75	1	0.5	0	15	18
636	27	70.6	40	cesarean delivery	0	1	1	0	0	0	18	1	0.5	0	15	19
637	36	70	39	cesarean delivery	1	1	1	0	0	1	16.5	1	0.5	0	8	21
638	47	68	39	cesarean delivery	0	3	1	0	0	1	17.25	1	0	0	10	16
639	37	72	38	cesarean delivery	0	2	1	0	0	0	18	1	0	10	14	22
640	36	66	38	cesarean delivery	1	2	1	0	0	1	15	0	0.25	0	6	8
641	31	73.5	40	cesarean delivery	1	3	1	0	0	1	15	0	0	0	15	22
642	37	65	36	cesarean delivery	1	3	1	0	0	0	18	1	0.5	0	14	23
643	39	67	39	cesarean delivery	0	2	1	0	0	0	16.5	1	1	0	8	15
644	31	85	39	cesarean delivery	0	2	1	0	0	0	16.5	1	1	0	8	15
645	38	76.5	38	cesarean delivery	0	1	1	0	0	0	16.5	1	0.25	0	10	21
646	33	75	38	cesarean delivery	1	1	1	0	0	1	13.5	1	0	0	15	20
647	30	63.5	39	cesarean delivery	1	3	1	0	0	1	15.75	1	0	6	10	14
648	41	63	39	cesarean delivery	1	1	2	0	0	0	20.25	1	0.5	0	7	11
649	36	70	37	cesarean delivery	1	1	1	0	0	0	18.75	1	0.5	0	14	22
650	33	72	36	cesarean delivery	1	3	1	0	1	0	16.5	0	0.5	0	5	12
651	33	57	39	cesarean delivery	1	3	1	0	0	0	16.5	0	0	0	7	12
652	28	57.4	39	cesarean delivery	1	1	1	0	0	1	19.5	1	0.5	0	11	15
653	30	101	39	cesarean delivery	0	3	1	0	0	0	16.5	0	0	0	9	16
654	25	54	38	cesarean delivery	0	2	1	0	0	1	15	1	0.25	0	10	18
655	42	67	38	cesarean delivery	0	2	1	0	0	1	15	1	0.25	0	14	22
656	32	87.5	38	cesarean delivery	0	2	1	0	0	1	15	1	0	0	7	15
657	36	100	39	cesarean delivery	1	1	1	0	0	1	19.5	1	0.5	0	10	16
658	28	70	39	cesarean delivery	1	1	1	0	0	1	18.75	1	0.5	0	7	12
659	31	61	38	cesarean delivery	1	2	1	0	0	1	15	1	0.25	0	5	12
660	34	66	68	cesarean delivery		1	1	0	0	0	18.75	1	0.5	0	10	18	Missing data
661	36	69	39	cesarean delivery	0	1	1	0	0	1	18.75	0	0	0	12	19
662	33	71	69	cesarean delivery	0	1	1	0	0	0	19.5	1	0.5	0	10	18
663	27	75	34	cesarean delivery	1	3	1	0	1	0	15	0	0	0	10	14
664	33	60	39	cesarean delivery	1	3	1	0	0	1	16.5	0	0	0	21	28
665	30	65.6	34	cesarean delivery	1	2	1	0	0	0	16.5	0	0	0	8	20
666	32	71.2	39	cesarean delivery	0	3	1	0	0	1	16.5	1	0.5	0	7	12
667	35	75	38	cesarean delivery	0	3	1	0	0	1	17.25	1	0	0	9	19
668	31	72.6	39	cesarean delivery	1	2	1	1	0	0	18.75	1	0	0	17	26
669	34	74	39	cesarean delivery	0	2	1	0	0	1	16.5	1	0	0	11	18
670	41	81	37	cesarean delivery	1	2	1	0	0	1	18.75	1	0.5	0	8	14
671	29	68	39	cesarean delivery	0	2	1	0	0	1	16.5	1	0	0	10	16
672	36	65	38	cesarean delivery	0	1	1	0	0	1	18.75	1	0.5	0	20	30
673	33	81	36	cesarean delivery	0	2	1	0	1	1	16.5	1	1	0	15	30
674	28	67	40	cesarean delivery	1	1	2	0	0	1	19.5	0	0	0	5	9
675	39	75	38	cesarean delivery	1	2	1	0	0	1	15	0	0	0	20	27
676	40	72	40	cesarean delivery	1	3	1	0	0	0	15.75	1	0	0	10	15
677	42	76.5	39	cesarean delivery	1	1	1	0	0	1	18.75	1	0.5	0	10	13
678	29	77	39	cesarean delivery	0	1	1	0	0	1	18.75	1	0.5	0	5	11
679	28	67	37	cesarean delivery	0	1	1	0	0	1	16.5	0	0.5	0	5	15
680	33	57	40	cesarean delivery	0	1	1	0	0	1	18.75	0	0	0	17	21
681	32	68	39	cesarean delivery	1	1	2	0	0	1	20.25	1	0.5	6	6	10
682	37	80	39	cesarean delivery	0	1	1	0	0	1	19.5	1	0.5	0	11	18
683	33	77	36	cesarean delivery	1	1	1	0	0	0	18.75	0	0	0	7	15
684	23	78	39	cesarean delivery	1	1	1	0	0	1	16.5	1	0.5	6	12	29
685	29	74	40	cesarean delivery	1	3	1	0	0	0	13.5	1	0.5	6	14	21
686	45	68	38	cesarean delivery	1	2	1	1	0	0	18	1	0	0	10	17
687	36	70.2	38	cesarean delivery	1	3	1	0	0	0	16.5	0	0.5	0	3	13
688	42	75	39	cesarean delivery	0	1	1	0	0	1	16.5	1	0.5	0	15	24
689	29	72	39	cesarean delivery	0	1	1	0	0	1	16.5	1	0.25	0	20	28
690	32	89	40	cesarean delivery	1	1	1	0	0	1	15	1	0.5	0	12	22
691	36	71.4	41	cesarean delivery	1	2	1	1	0	0	18.75	1	0	12	18	27
692	36	71	39	cesarean delivery	0	1	1	0	0	1	18.75	1	0.5	6	6	14
693	26	68	41	cesarean delivery	1	1	1	0	0	0	18.75	1	0.5	6	15	24
694	29	86	39	cesarean delivery	0	2	1	0	0	0	16.5	1	0.5	0	15	32
695	37	80	39	cesarean delivery	0	1	1	0	0	0	16.5	1	0	0	8	12
696	38	72	39	cesarean delivery	0	1	1	0	0	1	18.75	1	0.5	0	8	15
697	39	84	39	cesarean delivery	0	1	1	0	0	0	18.75	1	0	0	8	16
698	29	70	39	cesarean delivery	1	1	1	0	0	0	18.75	1	0.5	6	9	17
699	39	70	38	cesarean delivery		3	1	0	0	1	17.25	1	0	0	6	13	Missing data
700	32	69.8	38	cesarean delivery	0	1	1	0	0	0	18	1	0	0	10	19
701	36	66.4	41	cesarean delivery	1	2	1	0	0	1	15.75	1	0.3	0	10	17
702	42	61.6	39	cesarean delivery	0	1	1	0	0	1	11	1	0.5	0	12	20
703	32	72	40	cesarean delivery	1	3	1	0	0	0	18.75	1	0	12	9	13
704	33	74	39	cesarean delivery	1	1	1	0	0	1	16.5	0	0	0	20	26
705	36	65	38	cesarean delivery	0	2	1	0	0	1	16.5	1	0.25	0	11	17
706	37	103	36	cesarean delivery	1	2	1	1	0	1	15	1	0.5	0	12	22
707	37	84	39	cesarean delivery	0	3	1	0	0	1	18.75	1	0	0	17	25
708	35	82	39	cesarean delivery	0	2	1	0	0	1	18.75	1	0	5	10	18
709	29	81.5	37	cesarean delivery	0	3	1	0	1	1	15.75	0	0.2	0	13	18
710	34	82	39	cesarean delivery	0	3	1	0	0	1	15.75	1	0.2	0	20	27
711	31	69	38	cesarean delivery	1	2	1	0	0	0	18	1	0	0	10	17
712	30	81	39	cesarean delivery	0	1	1	0	0	0	18	1	0.5	0	12	20
713	38	69.3	36	cesarean delivery	1	1	1	0	0	0	18	1	0.5	0	9	15
714	24	80	37	cesarean delivery	0	3	1	0	0	1	17.75	1	0	0	10	16
715	38	73.5	40	cesarean delivery	1	3	1	0	0	1	16.5	1	1	0	18	24
716	30	75	38	cesarean delivery	0	3	1	0	0	1	16.5	1	0.2	0	14	20
717	35	70	37	cesarean delivery	0	2	1	0	1	0	15	1	1	30	15	21
718	32	71	39	cesarean delivery	1	1	1	0	0	1	20.25	1	0.5	0	7	16
719	33	60	38	cesarean delivery	1	1	1	0	0	0	12.5	1	0.5	0	17	23
720	33	63.5	38	cesarean delivery	1	1	1	0	0	1	12.5	1	0	0	25	31
721	44	75	37	cesarean delivery	1	1	1	0	0	1	16.5	1	0	0	10	21
722	29	67.5	39	cesarean delivery	0	1	1	1	0	1	18.75	1	0.5	6	13	18
723	28	66.8	39	cesarean delivery	1	2	1	0	0	1	18.75	0	0	0	15	20
724	35		38	cesarean delivery	0	3	1	0	0	0	16.5	1	0.5	6	3	6	Missing data
725	34	78	39	cesarean delivery	0	1	1	0	0	1	16.5	1	0.5	0	20	28
726	40	69	38	cesarean delivery	0	2	1	0	0	1	17.25	0	0	0	9	15
727	41	76.5	38	cesarean delivery	1	1	1	0	0	0	18.75	1	0.25	0	10	18
728	29	75	38	cesarean delivery	1	2	1	0	0	0	16.5	1	0.5	0	7	14
729	33	65.5	39	cesarean delivery	0	1	1	0	0	1	18.75	1	0.5	0	9	16
730	33	85	37	cesarean delivery	0	1	1	0	1	0	19.5	1	0	0	7	13
731	34	77.5	38	cesarean delivery	1	3	1	0	0	0	18	1	1	0	21	28
732	31	71.4	39	cesarean delivery	0	3	1	0	0	0	16	1	0.5	0	11	16
733	34	90	39	cesarean delivery	0	3	1	0	0	0	17	0	0	0	8	15
734	31	67	38	cesarean delivery	0	1	1	0	0	0	13.5	1	0.5	0	25	30
735	30	84	39	cesarean delivery	0	1	1	0	0	1	11.5	1	0.5	6	18	24
736	36	73	36	cesarean delivery	0	1	1	0	1	1	11	1	0.5	0	16	24
737	30	83.5	39	cesarean delivery	1	2	1	0	0	1	15	1	0.5	0	15	23
738	28	75	39	cesarean delivery	1	3	2	0	0	1	16.5	1	1	0	16	30
739	46	65	39	cesarean delivery	0	2	1	0	0	1	16.5	1	0.5	12	18	25
740	31	74.8	38	cesarean delivery	0	3	1	0	1	0	17.25	1	1	12	20	26
741	39	59	40	cesarean delivery	1	2	1	0	0	1	16.5	1	0.25	0	8	12
742	29	66	41	cesarean delivery	1	2	1	0	0	1	15	1	0.25	0	25	35
743	35	81	37	cesarean delivery	1	2	1	0	0	1	15	1	0.1	0	17	29
744	31	72.5	39	cesarean delivery	1	3	1	0	0	1	16.5	1	0	0	15	51
745	33	71.5	38	cesarean delivery	1	3	1	0	0	1	16.5	1	1	0	21	25
746	34	76	37	cesarean delivery	1	3	1	0	0	1	16.5	1	1	0	21	35
747	35	63.2	38	cesarean delivery	1	2	1	0	0	0	16.5	0	0	0	10	15
748	24	84	38	cesarean delivery	0	1	1	0	0	0	13.5	1	0.5	0	13	23
749	26	69	39	cesarean delivery	0	2	1	0	0	1	15.75	1	0	0	19	25
750	40	68	39	cesarean delivery	0	3	1	0	0	0	15	1	0.5	0	7	13
751	36	75	39	cesarean delivery	0	1	1	0	0	1	18.75	0	0	0	12	18
752	41	71	39	cesarean delivery	1	1	1	1	0	0	18.75	1	0	0	9	14
753	34	74.6	37	cesarean delivery	1	2	1	0	0	1	16.5	0	0.25	0	20	28
754	32	76	41	cesarean delivery	1	2	1	0	0	0	16.5	1	0.5	0	12	30
755	29	76	40	cesarean delivery	1	3	1	0	0	0	17	0	0.5	0	7	12
756	35	69.5	39	cesarean delivery	0	2	1	0	0	0	16.5	1	0.5	0	10	21
757	27	57.3	39	cesarean delivery	0	2	1	0	0	0	16.5	1	0.5	0	13	21
758	38	87	36	cesarean delivery	0	2	1	0	1	0	18.75	1	0	0	10	17
759	27	86.5	41	cesarean delivery	1	2	1	0	0	0	16.5	1	0.5	0	4	15
760	30	68	36	cesarean delivery	1	1	1	0	0	1	17.25	1	0.5	0	15	25
761	26	66.4	38	cesarean delivery	1	1	2	0	0	1	11	1	0.5	6	6	11
762	28	60.4	39	cesarean delivery	0	2	1	0	0	0	16.5	1	0	6	31	36
763	39	48.2	38	cesarean delivery	0	2	1	0	0	0	18	1	0.5	0	10	11
764	37	77	39	cesarean delivery	1	3	1	0	0	1	16.5	1	1	0	21	32
765	39	85	39	cesarean delivery	0	3	1	0	0	1	16.5	0	0	0	7	17
766	35	60	39	cesarean delivery		1	1	0	0	1	18.75	1	0.5	0	9	19	Missing data
767	35	65	39	cesarean delivery	1	1	1	0	0	0	18.75	0	0	0	5	8
768	35	61.5	39	cesarean delivery	0	2	1	0	0	0	16.5	1	1	0	15	23
769	39	81.6	39	cesarean delivery	0	2	1	0	0	0	16.5	0	0.5	0	10	13
770	35	92	38	cesarean delivery	1	1	2	0	0	1	11	1	0.5	0	10	15
771	36	77	37	cesarean delivery	1	1	1	0	0	1	16.5	1	0.5	0	13	19
772	40	85	39	cesarean delivery	1	1	1	0	0	1	18.75	1	0.5	6	9	24
773	31	89.6	38	cesarean delivery	1	2	1	0	0	1	15	1	0.25	0	5	21
774	33	70	38	cesarean delivery	0	3	1	0	1	1	15	1	0.1	0	13	18
775	28	78	39	cesarean delivery	0	3	1	0	0	0	16	1	0.1	0	6	11
776	32	50	40	cesarean delivery	1	2	1	0	0	0	16.5	1	0.5	0	8	10
777	36	80.5	40	cesarean delivery	0	3	1	0	0	0	18.75	1	0	15	28	30
778	38	59	38	cesarean delivery	1	2	1	0	0	1	17.25	1	0.5	6	15	20
779	25	52.1	39	cesarean delivery	1	3	1	0	0	1	16.5	1	1	0	9	12
780	32	94	39	cesarean delivery	0	3	1	0	0	1	18.75	1	0	0	12	21
781	37	70	37	cesarean delivery	0	2	1	0	1	0	16.5	1	1	0	8	21
782	25	80	38	cesarean delivery	1	2	1	0	0	0	16.5	0	0.5	0	8	14
783	29	60	39	cesarean delivery	1	3	1	0	0	0	16	1	0	0	8	10
784	32	72.2	36	cesarean delivery	1	1	1	0	1	1	11	1	0.25	0	11	16
785	39	72	38	cesarean delivery	1	1	1	1	0	1	11	1	0.5	0	19	23
786	28	60	39	cesarean delivery	1	1	1	0	0	1	18.75	1	0.5	0	11	18
787	33	64	37	cesarean delivery	0	3	1	0	1	1	16.5	0	0	0	6	22
788	40	66	38	cesarean delivery	0	3	1	0	0	1	16.5	0	0	0	10	18
789	31	63	40	cesarean delivery	0	3	1	0	0	1	16.5	1	0	0	15	19
790	30	69.5	38	cesarean delivery	1	3	1	1	0	0	18.75	1	0	0	10	20
791	34	75	39	cesarean delivery	1	2	1	0	0	1	16.5	1	0.5	0	10	14
792	21	70	39	cesarean delivery	1	1	1	0	0	0	12.5	1	0.5	0	15	23
793	37	64	38	cesarean delivery	0	2	1	0	0	1	16.5	0	0	0	10	14
794	35	65	38	cesarean delivery	1	3	1	0	0	1	16.5	1	1	0	17	21
795	34	73	39	cesarean delivery	1	3	1	0	0	1	16.5	0	0.5	0	15	20
796	34	66.3	37	cesarean delivery	0	1	1	0	1	0	18	1	0.5	0	12	15
797	40	67	38	cesarean delivery	0	1	1	0	0	1	15.75	1	0	0	12	19
798	31	68	39	cesarean delivery	0	1	1	0	0	1	16.5	1	0.5	6	10	15
799	34	76	38	cesarean delivery	1	2	1	0	0	0	15	0	0	0	11	20
800	36	70	38	cesarean delivery	0	2	1	0	0	1	19.5	1	1	0	12	17
801	35	75	38	cesarean delivery	0	2	1	0	0	0	16.5	0	0	0	5	17
802	38	72	38	cesarean delivery	0	2	1	1	0	0	16.5	1	0.5	0	14	21
803	31	83.2	39	cesarean delivery	0	3	1	0	0	1	16.5	1	0.25	0	12	16
804	30	77.6	39	cesarean delivery	1	3	1	0	0	1	16.5	1	1	0	17	24
805	33	69	39	cesarean delivery	0	1	1	0	0	1	16.5	1	0.5	0	16	27
806	41	75	38	cesarean delivery	1	3	1	0	0	0	15.75	0	0	0	11	16
807	31	80	38	cesarean delivery	0	3	1	0	0	0	18.75	1	0.5	6	16	27
808	42	78.2	36	cesarean delivery	1	1	1	0	0	1	11	0	0.5	0	15	30
809	31	69	40	cesarean delivery	1	2	2	0	0	1	17.25	1	0.5	0	10	21
810	26	76.3	39	cesarean delivery	0	3	1	0	0	1	17.25	0	0	0	17	26
811	30	71	38	cesarean delivery	0	3	1	0	0	1	16.5	1	0.5	0	8	16
812	47	88	38	cesarean delivery	0	3	1	0	0	1	17.25	1	0.5	0	7	13
813	29	65	39	cesarean delivery	1	3	2	0	0	1	17.25	1	0	0	10	15
814	22	60	37	cesarean delivery	1	3	1	0	0	1	16.5	1	1	0	21	29
815	35	60	39	cesarean delivery	1	1	1	0	0	0	21	0	0	0	12	19
816	35	88	39	cesarean delivery	1	2	1	0	0	0	20.25	1	0.5	0	9	16
817	34	66	39	cesarean delivery	1	3	1	0	0	1	18.75	1	0.5	0	9	17
818	28	74	36	cesarean delivery	1	2	1	0	0	1	16.5	1	0.5	0	4	14
819	33	73	39	cesarean delivery	1	2	1	0	0	0	16.5	1	0	12	8	19
820	37	78	38	cesarean delivery	0	1	1	0	0	0	13.5	1	0	0	20	25
821	41	64.7	38	cesarean delivery	1	1	1	0	0	0	15	1	0.5	0	14	20
822	29	66	38	cesarean delivery	0	3	1	0	0	0	16	1	0.5	0	12	22
823	31	73.5	38	cesarean delivery	1	3	1	0	0	1	16.5	1	1	0	12	30
824	25	75	38	cesarean delivery	0	3	1	0	0	1	17.25	1	0	0	11	23
825	33	75	38	cesarean delivery	0	2	1	0	0	1	18.75	1	1	0	13	19
826	34	60	38	cesarean delivery	0	2	1	0	0	1	16.5	1	0	12	14	23
827	29	71	39	cesarean delivery	0	1	1	0	0	1	18	1	0.5	0	19	27
828	40	72.5	38	cesarean delivery	0	3	1	0	0	1	18.75	1	0	0	15	21
829	28	71.5	39	cesarean delivery	1	1	1	0	0	0	18.75	1	0.5	0	8	13
830	27	65	39	cesarean delivery	1	1	1	0	0	0	16.5	0	0	0	8	16
831	34	81.5	36	cesarean delivery	1	2	1	0	0	1	18.75	1	1	0	13	18
832	30	73.5	39	cesarean delivery	1	3	1	0	0	0	18.75	1	0.5	0	11	16
833	28	75	39	cesarean delivery	1	1	1	1	0	1	18.75	1	0.5	0	7	13
834	26	85	38	cesarean delivery	1	2	1	0	0	1	15	1	0.5	0	17	27
835	28	62	41	cesarean delivery	1	2	1	0	0	1	16.5	0	0	0	10	18
836	33	57	36	cesarean delivery	0	1	1	0	0	1	12.5	1	0	0	10	18
837	46	52.5	38	cesarean delivery	1	2	1	0	0	1	15	1	0.5	0	23	29
838	34	76.5	39	cesarean delivery	1	3	1	0	0	1	16.5	1	1	0	14	18
839	34	60	38	cesarean delivery	0	2	1	0	0	1	18.75	1	1	6	17	27
840	41	64	38	cesarean delivery	0	2	1	0	0	1	18	0	0	0	7	16
841	39	68	41	cesarean delivery	1	3	1	0	0	0	16.5	0	0	0	13	17
842	31	59	36	cesarean delivery	1	1	1	0	0	1	17.25	1	0	0	16	20
843	38	80	39	cesarean delivery	0	2	1	0	0	1	16.5	1	0.5	0	12	17
844	32	84.7	39	cesarean delivery	0	2	1	0	0	0	16.5	0	0	0	11	16
845	28	74	38	cesarean delivery	0	1	1	0	0	1	11	0	0.5	0	30	40
846	28	66	38	cesarean delivery	0	2	1	0	0	0	16.5	1	0	12	8	13
847	37	72	34	cesarean delivery	1	2	1	0	0	0	15	1	0.5	0	10	19
848	37	74	39	cesarean delivery	0	2	1	0	0	1	18.75	1	0.5	6	9	15
849	28	68	37	cesarean delivery	0	3	1	0	0	1	15.75	0	0.25	0	12	17
850	37	62	38	cesarean delivery	1	3	1	0	0	1	15	1	0.25	6	5	17
851	39	64.5	36	cesarean delivery	1	1	1	0	1	1	18.75	1	0.5	0	27	30
852	37	71	38	cesarean delivery	0	1	1	0	0	1	17.25	1	0.5	0	13	18
853	37	65	39	cesarean delivery	0	1	1	1	0	1	17.25	1	0	0	16	24
854	29	62	39	cesarean delivery	0	3	1	0	0	1	16.5	1	0.5	0	11	15
855	35	57	38	cesarean delivery	0	1	1	0	0	1	17.25	1	1	0	11	19
856	30	85	39	cesarean delivery	0	1	1	0	0	0	18.75	1	0.5	0	10	17
857	31	72	37	cesarean delivery	0	1	1	0	0	1	17.25	1	0.5	0	15	24
858	31	75	37	cesarean delivery	1	3	1	0	0	0	17.25	0	0	0	11	16
859	30	60	38	cesarean delivery	1	1	2	0	0	1	18.75	0	0	0	9	13
860	35	67	36	cesarean delivery	1	3	1	0	0	1	17.25	1	1	0	13	18
861	30	60	38	cesarean delivery	0	3	1	1	0	1	13.5	1	0.25	0	12	18
862	32	60	39	cesarean delivery	1	3	1	0	0	1	13.5	1	0.5	0	9	13
863	30	66	39	cesarean delivery	1	2	1	0	0	1	15	0	0.25	0	13	18
864	28	67	38	cesarean delivery	0	1	1	0	0	0	13.5	1	0.5	0	17	24
865	30	65	39	cesarean delivery	0	3	1	0	0	0	16	0	0.5	6	10	19
866	41	71	33	cesarean delivery	1	2	1	0	0	0	16.5	1	0.5	0	5	16
867	34	73	40	cesarean delivery	1	3	1	0	0	0	17.25	0	0	0	11	14
868	33	77.6	39	cesarean delivery	1	2	1	0	0	0	16.5	1	0.5	0	10	19
869	28	60	38	cesarean delivery	1	2	1	0	0	0	18.75	1	0.5	0	7	10
870	33	65	37	cesarean delivery	1	1	1	0	0	1	11	0	0.5	0	13	30
871	33	71	38	cesarean delivery	0	3	1	0	0	1	16.5	1	0.25	0	8	14
872	28	69.5	36	cesarean delivery	1	3	1	0	0	1	15.75	0	0.5	0	13	16
873	39	85	39	cesarean delivery	1	3	1	0	0	0	15.75	1	0	0	11	16
874	35	70.5	36	cesarean delivery	1	2	1	0	0	1	15	1	0	0	10	25
875	26	60	38	cesarean delivery	1	3	1	0	0	1	16.5	1	0.5	0	11	16
876	34	69	39	cesarean delivery	0	3	1	0	0	1	16.5	1	0.5	0	8	13
877	39	64.2	38	cesarean delivery	0	1	1	0	0	1	16.5	1	0.5	6	17	26
878	32	85	40	cesarean delivery	1	1	1	0	0	0	16.5	1	0.5	0	8	12
879	36	63.3	38	cesarean delivery	0	3	1	0	0	0	16.5	1	0.5	0	8	21
880	36	76.1	38	cesarean delivery	0	3	1	0	0	1	16.5	0	0	0	10	12
881	34	82.9	38	cesarean delivery	0	3	1	0	0	1	16.5	1	0.5	0	14	24
882	32	61	39	cesarean delivery	0	1	1	0	0	0	15	1	0.5	0	13	19
883	34	64.5	39	cesarean delivery	0	3	1	0	0	1	16.5	1	0.5	0	11	19
884	34	63.6	38	cesarean delivery	0	1	1	0	0	0	17.25	1	0.5	0	15	23
885	35	94.5	38	cesarean delivery	0	1	1	0	0	1	18.75	1	0.5	0	9	17
886	28	83	41	cesarean delivery	1	2	1	1	0	0	18.75	1	0.5	0	8	12
887	37	79	38	cesarean delivery	1	2	1	0	0	1	16.5	1	0.25	0	17	20
888	35	86	38	cesarean delivery	0	2	1	0	0	1	15	1	0.25	0	12	23
889	28	78	39	cesarean delivery	0	1	1	0	0	0	18	1	0.5	0	19	23
890	33	87	38	cesarean delivery	0	3	1	0	0	1	16.5	1	0.5	0	12	18
891	43	81.8	38	cesarean delivery	1	2	1	0	0	0	16.5	1	0.5	0	15	19
892	26	75.9	40	cesarean delivery	1	2	1	0	0	0	16.5	1	0.5	0	5	15
893	33	69	39	cesarean delivery	1	2	1	0	0	1	11	1	0.5	0	20	27
894	28	68	38	cesarean delivery	0	1	1	0	0	0	18.75	1	0.5	0	15	20
895	39	73.5	39	cesarean delivery	0	1	1	0	0	0	17.25	1	0.5	0	28	36
896	29	75	39	cesarean delivery	0	3	1	0	0	1	16.5	1	1	0	17	24
897	32	65	38	cesarean delivery	1	2	1	0	0	0	16.5	1	0.5	0	25	30
898	24	77.5	39	cesarean delivery	0	1	1	0	0	1	18.75	1	1	0	9	14
899	24	61.8	39	cesarean delivery	0	3	1	0	0	0	16.5	0	0	0	14	16
900	29	67	40	cesarean delivery	1	3	1	0	0	1	17.25	1	0	0	12	14
901	34	80	39	cesarean delivery	0	3	1	0	0	1	17.25	1	0	0	8	16
902	40	77.5	34	cesarean delivery	0	3	1	0	1	1	15	1	0.5	0	10	19
903	25	65.5	39	cesarean delivery	0	1	1	0	0	1	16.5	1	0.5	0	15	20
904	37	85	37	cesarean delivery	1	3	1	0	0	1	15.75	1	0.5	0	13	23
905	34	63.5	38	cesarean delivery	0	3	1	0	0	1	17.25	0	0	0	11	16
906	31	57	38	cesarean delivery	1	3	1	0	0	1	15.75	1	0	0	11	15
907	28	68	40	cesarean delivery	1	2	1	0	0	0	17.25	0	0.5	0	8	14
908	32	77	39	cesarean delivery	0	3	1	0	0	1	17.25	0	0	0	11	16
909	30	68	38	cesarean delivery	0	2	1	0	0	1	15	1	0.25	0	5	10
910	37	71	38	cesarean delivery	0	2	1	0	0	1	15	1	0.25	0	16	26
911	36	72	39	cesarean delivery	0	1	1	0	0	0	18.75	1	0.5	0	14	25
912	33	83	39	cesarean delivery	0	1	1	0	0	0	18.75	1	0.5	0	14	21
913	32	81.7	39	cesarean delivery	1	2	1	0	0	0	17.25	1	0	0	15	24
914	34	63	37	cesarean delivery	1	2	1	0	0	0	16.5	0	0	0	10	14
915	38	69	39	cesarean delivery	1	3	1	0	0	1	16.5	1	1	0	16	22
916	32	75	39	cesarean delivery	0	3	1	0	0	1	16.5	1	1	0	10	16
917	35	76	39	cesarean delivery	0	3	1	0	0	1	16.5	1	1	0	9	19
918	27	65	39	cesarean delivery	0	1	1	0	0	0	18.75	1	0.5	0	16	22
919	34	60	38	cesarean delivery	0	3	1	0	0	1	17.25	1	0	0	10	19
920	34	59	37	cesarean delivery	1	1	1	0	0	1	11	1	0	0	16	22
921	34	68	40	cesarean delivery	1	1	1	0	0	1	12.5	1	0.5	0	13	19
922	32	72	38	cesarean delivery	1	1	1	0	0	1	12.5	0	0.5	0	12	20
923	36	78.5	39	cesarean delivery	1	3	1	0	0	1	12.5	1	0.5	0	18	25
924	38	62	39	cesarean delivery	0	1	1	0	0	1	11	0	0.5	0	15	33
925	42	96	36	cesarean delivery	1	2	1	0	0	1	15	1	0	12	8	16
926	28	65	41	cesarean delivery	1	3	1	0	0	1	11	1	0.5	0	12	18
927	30	55.4	39	cesarean delivery	1	1	1	0	0	1	18.75	1	1	0	13	18
928	34	63	36	cesarean delivery	1	2	1	0	0	1	16	1	0.5	0	10	16
929	29	72.5	39	cesarean delivery	1	1	1	0	0	1	16.5	1	0.5	0	10	13
930	39	66	37	cesarean delivery	0	2	1	0	0	1	15	1	0.5	0	15	23
931	32	75	37	cesarean delivery	1	2	1	0	0	1	16.5	0	0.5	0	9	12
932	34	67	37	cesarean delivery	1	3	1	0	0	1	15	1	0.5	0	7	11
933	37	75	37	cesarean delivery	0	3	1	0	0	0	17	1	0	0	5	12
934	30	87	38	cesarean delivery	0	1	1	0	0	0	17.25	1	0.5	0	18	25
935	31	62	38	cesarean delivery	1	3	1	0	0	0	17.25	0	0	0	10	14
936	27	67	39	cesarean delivery	0	1	1	0	0	1	18.75	1	0	6	12	16
937	31	68	40	cesarean delivery	1	1	1	0	0	1	18.75	1	0.5	0	14	19
938	32	65.8	38	cesarean delivery	0	1	1	0	0	1	12.5	1	0.5	0	13	17
939	45	75	35	cesarean delivery	0	1	1	0	0	0	13.5	0	0	0	23	29
940	29	65	49	cesarean delivery	0	1	1	0	0	1	18.75	1	0.5	0	6	13
941	38	88	38	cesarean delivery	0	2	1	0	0	1	17.25	0	0	0	12	18
942	38	74.8	39	cesarean delivery	0	2	1	0	0	0	16.5	0	0	0	15	20
943	31	70	40	cesarean delivery	1	1	1	0	0	1	11	1	0.5	0	12	17
944	32	73	38	cesarean delivery	0	1	1	0	0	1	13.5	0	0.5	0	20	25
945	33	75	36	cesarean delivery	1	3	1	0	1	1	16.5	1	2	0	18	24
946	38	77	37	cesarean delivery	0	1	1	0	0	0	13.5	1	0	0	20	25
947	44	58.8	39	cesarean delivery	0	1	1	0	0	1	17.25	1	0.5	0	16	23
948	28	60	40	cesarean delivery	1	3	1	0	0	0	18.75	1	0.5	0	15	21
949	30	78	38	cesarean delivery	0	1	1	0	0	1	13.5	0	0.5	0	25	32
950	30	67	36	cesarean delivery	1	3	1	0	0	0	17.25	0	0	0	13	17
951	30	68	40	cesarean delivery	1	2	1	0	0	1	15	1	0.5	6	7	11
952	32	65	38	cesarean delivery	0	2	1	0	0	0	16.5	1	0	0	20	32
953	39	69.6	38	cesarean delivery	0	2	1	0	0	0	16.5	1	0.5	0	8	18
954	30	58.6	39	cesarean delivery	1	1	1	0	0	0	15	0	0	0	10	17
955	36	73	39	cesarean delivery	0	2	1	0	0	0	18.75	0	0	0	15	22
956	29	73.6	38	cesarean delivery	1	1	1	0	0	1	11	1	0.5	0	20	30
957	29	52.5	39	cesarean delivery	1	2	1	0	0	0	16.5	1	0.5	6	8	18
958	33	71.5	39	cesarean delivery	1	2	1	0	0	1	17.25	1	0	0	15	20
959	32	65	38	cesarean delivery	1	3	1	0	0	1	16.5	0	0	0	16	20
960	29	56.6	37	cesarean delivery	1	3	1	0	0	1	17.25	1	0.5	0	10	13
961	36	69	39	cesarean delivery	0	1	1	0	0	0	18.75	0	0.5	0	17	25
962	36	62.8	39	cesarean delivery	0	2	1	1	0	0	16.5	0	0.5	6	20	24
963	35	61.6	37	cesarean delivery	1	2	1	0	0	0	16.5	0	0.5	0	10	20
964	27	84	39	cesarean delivery	0	1	1	0	0	1	18.75	1	1	0	15	26
965	34	63	39	cesarean delivery	0	1	1	0	0	0	19.5	1	1	0	18	22
966	31	58.3	38	cesarean delivery	0	3	1	0	0	0	16.5	1	0	0	16	22
967	40	78.5	38	cesarean delivery	0	3	1	0	0	1	17.25	0	0	0	13	24
968	34	71.5	39	cesarean delivery	0	1	1	0	0	0	18.75	0	0	0	28	33
969	29	83	39	cesarean delivery	1	1	1	0	0	1	18.75	1	0	0	5	8
970	41	62.4	39	cesarean delivery	0	1	1	0	0	1	11	0	0	0	16	28
971	36	83	38	cesarean delivery	0	1	1	0	0	1	11	0	0	0	10	17
972	27	54	40	cesarean delivery	1	2	1	0	0	0	15.75	1	0.5	0	10	17
973	33	90	40	cesarean delivery	1	3	1	0	0	0	18.75	1	0	15	20	25
974	31	67	40	cesarean delivery	1	3	1	0	0	1	15.75	1	0.5	0	9	14
975	35	80	38	cesarean delivery	1	1	1	0	0	0	11.5	1	0.5	0	25	28
976	31	74	40	cesarean delivery	1	2	1	0	0	1	15	0	0	0	11	13
977	34	86	38	cesarean delivery	0	1	1	0	0	0	18.75	0	0	0	12	16
978	32	79	40	cesarean delivery	0	1	1	0	0	0	17.25	1	0.5	0	10	14
979	25	54	38	cesarean delivery	0	3	1	0	0	1	16	1	0.5	0	7	14
980	37	71.7	37	cesarean delivery	0	2	1	0	1	1	15	1	1	6	5	8
981	38	62	35	cesarean delivery	1	2	1	0	0	1	15	1	0	0	20	36
982	33	64.2	38	cesarean delivery	1	2	1	0	0	0	16.5	0	1	0	10	17
983	39	65	39	cesarean delivery	1	3	1	0	0	1	15	0	0	0	17	20
984	28	82.6	38	cesarean delivery	0	1	1	0	0	1	11	1	0.25	0	23	29
985	30	90	39	cesarean delivery	0	1	1	0	0	0	18.75	1	0.5	0	18	22
986	30	68	38	cesarean delivery	1	1	1	0	0	1	10	0	0.5	0	13	17
987	30	67.8	38	cesarean delivery	1	3	1	0	0	1	16.5	1	0.5	0	4	8
988	34	90	40	cesarean delivery	0	2	1	0	0	1	16.5	1	0.25	0	14	20
989	35	67	39	cesarean delivery	1	1	1	0	0	1	18	1	0.5	0	9	15
990	30	70	38	cesarean delivery	0	3	1	0	0	1	16.5	0	0	0	9	19
991	34	90	39	cesarean delivery	0	1	1	0	0	0	18.75	0	0	0	18	23
992	35	65	38	cesarean delivery	1	2	1	0	0	0	16.5	0	0	0	16	21
993	35	97	37	cesarean delivery	1	2	1	0	0	1	15	1	0.5	0	12	22
994	27	80	37	cesarean delivery	1	1	1	0	0	1	11	0	0.5	0	23	26
995	32	75	36	cesarean delivery	1	3	1	0	0	1	16.5	0	0	0	5	10
996	25	69	40	cesarean delivery	1	3	1	0	0	1	16.5	1	0	0	5	16
997	37	73	39	cesarean delivery	0	1	1	0	0	0	17.25	0	0	0	19	24
998	28	72	39	cesarean delivery	0	2	1	0	0	1	15	1	0	0	10	16
999	42	70.3	40	cesarean delivery	0	3	1	0	0	1	16.5	1	0.5	0	12	17
1000	31	62.6	36	cesarean delivery	0	3	1	0	0	1	16.5	1	0	0	9	17
1001	38	71.5	39	cesarean delivery	0	3	1	0	0	1	16.5	0	0	0	13	17
1002	29	75	38	cesarean delivery	0	3	1	0	1	1	15	1	0	0	14	19
1003	37	73.3	38	cesarean delivery	1	2	1	0	0	0	16.5	1	0.5	0	8	19
1004	35	78	39	cesarean delivery	1	1	1	0	0	1	11	0	0.5	0	13	17
1005	23	70	36	cesarean delivery	1	1	1	0	0	0	11.5	1	0.5	0	12	23
1006	29	104.5	39	cesarean delivery	1	3	1	1	0	1	16.5	1	1	0	4	9
1007	30	73.5	37	cesarean delivery	0	3	1	0	1	1	15.75	0	0	0	11	16
1008	33	76	38	cesarean delivery	1	2	1	0	0	1	15	1	0.5	6	10	15
1009	26	65	39	cesarean delivery	1	2	1	0	0	1	16.5	1	1	0	15	23
1010	28	70	39	cesarean delivery	0	2	1	0	0	0	16.5	1	1	18	10	17
1011	27	62.8	39	cesarean delivery	1	3	1	0	0	1	16.5	1	1	0	21	32
1012	29	87.4	40	cesarean delivery	0	3	1	0	0	1	18	1	1.5	0	5	10
1013	29	65	40	cesarean delivery	1	2	1	0	0	0	16.5	1	0.5	0	8	15
1014	35	66.2	39	cesarean delivery	0	1	1	0	0	1	16.5	1	0.5	0	15	21
1015	34	64	40	cesarean delivery	1	2	2	0	0	0	16.5	0	0	0	10	19
1016	29	72	39	cesarean delivery	0	2	1	0	0	1	18.75	1	1	0	7	13
1017	30	71	39	cesarean delivery	0	1	1	0	0	0	19.5	1	1.5	0	9	13
1018	31	67.6	39	cesarean delivery	0	1	1	0	0	1	18	1	0.5	0	9	13
1019	30	61	38	cesarean delivery	1	2	1	0	0	1	15	0	0.5	6	10	21
1020	31	75	36	cesarean delivery	1	2	1	0	0	1	15	0	0	0	12	27
1021	30	69	40	cesarean delivery	1	3	1	0	0	0	17.25	0	0	0	11	13
1022	42	64	37	cesarean delivery	1	3	1	0	0	1	16.5	1	0.5	0	13	18
1023	30	71.5	37	cesarean delivery	0	2	1	0	0	1	15.75	1	0.5	6	4	15
1024	33	56	38	cesarean delivery	0	2	1	0	0	1	15	0	0	0	7	15
1025	34	63	38	cesarean delivery	0	2	1	0	0	1	15	1	0	0	10	17
1026	32	80	38	cesarean delivery	0	2	1	0	0	1	15	1	0.5	0	20	36
1027	27	77.8	39	cesarean delivery	1	1	1	1	0	0	18.75	1	0.5	0	5	9
1028	27	71	38	cesarean delivery	0	1	1	0	0	1	16.5	1	0	0	17	23
1029	24	89	37	cesarean delivery	0	1	1	0	0	1	11	1	0.5	0	30	35
1030	29	71.5	40	cesarean delivery	1	3	1	0	0	1	18.75	1	0.5	0	9	17
1031	30	64	40	cesarean delivery	0	1	1	0	0	1	16.5	1	1	0	13	18
1032	28	86	39	cesarean delivery	0	3	1	0	0	1	16.5	1	0.5	0	6	10
1033	32	63.8	38	cesarean delivery	0	3	1	0	0	1	16.5	1	0.5	0	6	10
1034	33	67.6	39	cesarean delivery	1	2	1	0	0	1	16.5	1	0.5	0	13	18
1035	36	65	39	cesarean delivery	0	2	1	0	0	1	16.5	1	0.5	6	20	27
1036	34	65	38	cesarean delivery	0	2	1	0	0	1	15	1	0.5	0	20	26
1037	33	73	38	cesarean delivery	1	2	1	0	0	0	15	0	0.5	0	20	27
1038	30	62	40	cesarean delivery	1	2	1	0	0	0	16.5	1	0	0	10	17
1039	40	74.5	39	cesarean delivery	0	2	1	0	0	0	18.75	1	0	6	12	16
1040	31	71.9	39	cesarean delivery	1	3	1	0	0	1	16.5	1	1	0	21	25
1041	35	70	38	cesarean delivery	1	2	1	0	0	1	15.75	0	0	0	12	17
1042	30	76.8	40	cesarean delivery	1	3	1	0	0	1	16.5	1	0	0	8	13
1043	35	63	38	cesarean delivery	0	2	1	0	0	1	15	1	1	0	12	25
1044	31	61	37	cesarean delivery	1	3	1	1	0	0	17	1	0.5	0	7	15
1045	42	76	37	cesarean delivery	0	3	1	0	0	1	16.5	1	0.5	0	8	15
1046	29	89	37	cesarean delivery	1	3	1	0	0	1	15	0	0	0	7	15
1047	30	75	37	cesarean delivery	1	3	1	1	0	1	16.5	1	0	0	12	15
1048	28	64.7	38	cesarean delivery	1	1	1	0	0	1	18.75	1	0.5	0	10	14
1049	34	75.5	38	cesarean delivery	0	2	1	0	0	0	18.75	1	0.5	0	14	24
1050	32	77	38	cesarean delivery	1	1	1	0	0	0	13.5	1	0.5	0	20	24
1051	36	79.5	39	cesarean delivery	0	3	1	0	1	1	16.5	1	1	0	14	21
1052	31	77	36	cesarean delivery	1	1	1	0	0	0	15	1	0.5	0	10	15
1053	33	68	38	cesarean delivery	1	1	1	0	0	0	12.5	1	0.5	0	12	16
1054	38	101.3	39	cesarean delivery	1	3	1	0	0	1	17.25	1	1	0	21	32
1055	34	75.8	38	cesarean delivery	0	2	1	0	0	1	15	1	0.5	6	9	14
1056	35	83.5	40	cesarean delivery	0	2	1	0	0	1	15	1	0.5	0	12	22
1057	31	65	38	cesarean delivery	1	1	1	0	0	0	18.75	1	0.5	0	15	24
1058	41	79	37	cesarean delivery	1	3	1	0	0	0	16.5	0	0	0	10	23
1059	36	67	39	cesarean delivery	1	1	1	0	0	1	18.75	1	0.5	0	9	17
1060	30	75	39	cesarean delivery	0	2	1	0	0	0	16.5	0	0	0	8	17
1061	31	70	39	cesarean delivery	1	1	1	0	0	1	16.5	1	0.5	0	17	24
1062	35	76.8	39	cesarean delivery	0	3	1	0	0	1	17.25	1	1	0	8	15
1063	49	59.1	37	cesarean delivery	0	1	1	0	0	0	18.75	1	1	0	15	21
1064	35	79	40	cesarean delivery	1	3	1	0	0	0	18.75	1	0.5	0	7	14
1065	35	70	38	cesarean delivery	0	2	1	0	0	0	16.5	1	0.5	0	5	15
1066	29	65.3	39	cesarean delivery	0	2	1	0	0	0	16.5	1	0	6	5	13
1067	28	70	41	cesarean delivery	1	2	1	0	0	0	16.5	0	0	0	5	9
1068	40	57.6	41	cesarean delivery	0	2	1	0	0	1	15.75	1	0.5	0	8	18
1069	33	72	39	cesarean delivery	0	3	1	0	0	0	16.5	0	0	0	22	26
1070	24	61	39	cesarean delivery	0	1	1	0	0	0	18.75	0	0	0	15	18
1071	42	75	35	cesarean delivery	1	3	1	1	0	0	15	1	0	0	9	14
1072	35	62.3	38	cesarean delivery	0	3	1	0	0	1	16.5	0	0	0	7	13
1073	30	67	36	cesarean delivery	1	1	1	0	0	0	18.75	1	0	6	8	12
1074	36	73	39	cesarean delivery	0	1	1	0	0	1	16.5	1	0.5	0	16	24
1075	40	71	39	cesarean delivery	0	1	1	0	0	0	18.75	0	0	0	15	23
1076	33	73	39	cesarean delivery	0	1	1	0	0	0	18.75	0	0	0	13	21
1077	30	65.5	39	cesarean delivery	0	1	1	0	0	0	18.75	0	0	0	17	22
1078	39	64.8	40	cesarean delivery	1	3	1	0	0	1	16.5	1	0.5	0	12	15
1079	32	72	40	cesarean delivery	1	3	1	0	0	1	16.5	0	0	0	16	23
1080	31	93.6	33	cesarean delivery	1	1	1	0	0	1	15	1	0.5	0	15	23
1081	33	67	38	cesarean delivery	1	1	1	0	0	0	13.5	1	0.5	0	20	27
1082	30	55.5	39	cesarean delivery	1	1	1	0	0	0	13.8	1	0.5	0	15	22
1083	40	57	37	cesarean delivery	0	2	1	0	0	0	16.5	0	0.5	0	10	16
1084	31	84.5	41	cesarean delivery	1	3	1	0	0	0	18	1	0	10	12	15
1085	31	65.8	39	cesarean delivery	0	1	1	0	0	0	18.75	1	0.5	0	15	22
1086	35	86	39	cesarean delivery	0	1	1	0	0	1	18.75	1	0.5	0	30	34
1087	30	74	38	cesarean delivery	1	2	1	0	0	1	15	0	0	0	15	22
1088	32	62	35	cesarean delivery	1	2	1	1	0	1	15	1	0	0	12	17
1089	25	87.5	38	cesarean delivery	0	1	1	0	0	1	11	0	0	0	17	22
1090	35	76.5	38	cesarean delivery	0	1	1	0	0	1	11	0	0	0	10	18
1091	33	75	39	cesarean delivery	0	1	1	0	0	1	17.25	1	0	0	18	21
1092	27	82	40	cesarean delivery	1	3	1	0	0	1	16.5	0	0.5	0	9	12
1093	30	59	39	cesarean delivery	1	1	1	0	0	0	18.75	1	1	0	16	19
1094	22	73	41	cesarean delivery	1	1	1	0	0	1	15	1	0.5	0	10	13
1095	36	69.2	36	cesarean delivery	0	2	1	0	0	1	15.75	1	1	0	10	15
1096	30	80	38	cesarean delivery	0	2	1	0	0	1	15.75	0	0.5	0	10	15
1097	42	71.5	39	cesarean delivery	0	2	1	0	0	0	16.5	1	0.5	0	8	17
1098	43	65	39	cesarean delivery	0	3	1	0	0	1	11	1	0.5	0	17	20
1099	31	65	38	cesarean delivery	0	1	1	0	0	1	12.5	1	0.5	6	15	23
1100	37	61	37	cesarean delivery	1	1	1	0	0	0	19.5	0	0	0	10	17
1101	31	77.6	38	cesarean delivery	0	3	1	0	0	1	16.5	1	1	0	19	32
1102	32	68	35	cesarean delivery	1	3	1	0	0	0	18	1	0	6	8	16
1103	43	71	38	cesarean delivery	0	2	1	0	0	1	15	0	0	0	20	26
1104	30	64	38	cesarean delivery	1	3	1	0	0	1	18.75	1	0	15	12	23
1105	20	66	38	cesarean delivery	1	3	1	0	0	0	18	0	0	0	8	24
1106	28	75.5	39	cesarean delivery	1	3	1	0	0	1	18.75	1	1	0	6	12
1107	31	65	38	cesarean delivery	0	2	1	0	0	1	11	1	0.5	0	9	15
1108	36	53.8	37	cesarean delivery	0	3	1	0	0	1	15	0	0	0	10	24
1109	34	74.6	38	cesarean delivery	0	3	1	0	0	1	16.5	1	0.5	0	12	24
1110	38	52	38	cesarean delivery	1	2	1	0	0	1	15	0	0	0	10	19
1111	25	62.5	38	cesarean delivery	1	2	1	0	0	1	15	0	0	0	10	14
1112	31	60	37	cesarean delivery	0	1	1	0	0	0	18.75	1	0.5	0	15	18
1113	34	81.8	39	cesarean delivery	1	3	1	0	0	1	16.5	1	1	0	18	30
1114	26	57	38	cesarean delivery	0	3	1	0	0	0	16.5	0	0	0	19	23
1115	31	60.4	39	cesarean delivery	0	1	1	0	0	0	18.75	1	1	0	16	20
1116	33	54.5	40	cesarean delivery	1	1	1	0	0	0	17.25	1	0.5	0	10	15
1117	27	75	38	cesarean delivery	0	3	1	0	0	0	16.5	1	0.5	0	15	25
1118	29	75	38	cesarean delivery	0	3	1	0	0	1	17.25	1	0	0	10	23
1119	27	64	39	cesarean delivery	1	1	1	0	0	1	17.25	1	0.5	0	10	16
1120	36	82	38	cesarean delivery	0	3	1	0	0	1	15	1	0.5	0	11	20
1121	35	76	38	cesarean delivery	0	3	1	0	0	0	11	0	0	0	10	15
1122	32	67.7	39	cesarean delivery	1	3	1	0	0	1	16.5	0	1	0	16	24
1123	30	79.7	38	cesarean delivery	1	1	1	0	0	1	16.5	0	0	0	10	18
1124	30	64	39	cesarean delivery	1	3	1	0	0	1	17.25	1	0	6	4	8
1125	43	68.8	36	cesarean delivery	1	3	1	0	0	0	17.25	0	0	0	10	23
1126	32	51.2	38	cesarean delivery	1	1	1	1	0	0	10	1	0.25	0	12	18
1127	30	55.3	37	cesarean delivery	1	3	1	0	0	1	16.5	1	0	0	14	18
1128	32	78.5	36	cesarean delivery	0	3	1	0	0	1	16.5	0	0	0	8	15
1129	34	79	38	cesarean delivery	0	2	1	0	0	0	16.5	1	0	0	8	23
1130	31	92.5	36	cesarean delivery	0	3	1	0	0	1	16.5	1	0.5	0	11	15
1131	29	73.5	39	cesarean delivery	1	2	1	0	0	1	16.5	1	0.5	0	15	20
1132	25	59	39	cesarean delivery	1	1	1	0	0	1	16.5	0	0.5	0	5	20
1133	41	70	38	cesarean delivery	0	1	1	0	0	1	16.5	1	0.5	0	10	16
1134	30	84	38	cesarean delivery	1	3	1	0	0	1	15.75	1	0	0	10	18
1135	35	73.6	38	cesarean delivery	0	1	1	0	0	0	15	1	0.5	6	11	16
1136	31	53	38	cesarean delivery	1	3	1	0	0	0	17.25	1	0	0	18	23
1137	38	70.5	38	cesarean delivery	0	2	1	0	0	1	15	1	0	0	8	16
1138	33	53.1	38	cesarean delivery	1	3	1	0	0	0	18.75	1	0.5	15	11	17
1139	36	73	38	cesarean delivery	1	1	1	0	0	1	15.75	1	0	0	5	13
1140	36	63	39	cesarean delivery	1	1	1	0	0	1	17.25	1	0	0	10	15
1141	26	73.5	38	cesarean delivery	1	1	1	0	0	1	15.75	0	0	0	12	17
1142	24	85	40	cesarean delivery	1	1	1	0	0	1	16.5	0	0	0	25	42
1143	36	76.8	37	cesarean delivery	0	1	1	0	0	0	13.5	1	0.5	0	14	18
1144	30	72.5	38	cesarean delivery	0	1	1	0	0	0	13.5	1	0.5	0	18	23
1145	42	68	39	cesarean delivery	1	1	1	1	0	1	16.5	1	0	0	15	40
1146	30	98	39	cesarean delivery	0	2	1	0	0	0	16.5	0	0	0	10	23
1147	29	63	40	cesarean delivery	0	2	1	0	0	1	16.5	1	0.5	0	15	20
1148	29	76.3	39	cesarean delivery	0	2	1	0	0	1	16.5	1	0.5	0	20	24
1149	30	79.2	38	cesarean delivery	0	3	1	0	0	0	11	0	0	0	10	15
1150	30	69	38	cesarean delivery	0	1	1	0	0	1	18.75	1	0.5	0	7	12
1151	41	63	38	cesarean delivery	0	1	1	0	0	0	18.75	1	0.5	6	14	18
1152	31	72	39	cesarean delivery	0	1	1	0	0	0	18.75	1	0.5	0	16	25
1153	34	75	40	cesarean delivery	1	3	1	0	0	0	10	1	0	0	9	14
1154	32	73	38	cesarean delivery	0	3	1	0	0	1	11	0	0	0	22	26
1155	29	64	38	cesarean delivery	0	1	1	0	0	1	11	0	0	0	34	37
1156	35	78	39	cesarean delivery	0	2	1	0	0	1	16.5	1	0.5	0	5	16
1157	32	90	35	cesarean delivery	1	1	1	0	0	0	12.5	1	0.5	0	15	25
1158	35	73	38	cesarean delivery	0	2	1	0	0	1	16.5	1	0.5	6	5	14
1159	28	96	38	cesarean delivery	1	3	1	0	0	1	11	1	0	0	10	14
1160	35	84.6	40	cesarean delivery	1	1	1	0	0	1	11	0	0	0	11	19
1161	30	80	38	cesarean delivery	1	1	1	0	0	1	16.5	1	0.5	6	13	20
1162	29	56	37	cesarean delivery	0	1	1	0	0	0	17.25	0	0	0	11	14
1163	30	57.5	39	cesarean delivery	1	2	1	0	0	1	15	1	0.5	6	15	20
1164	29	83	38	cesarean delivery	0	1	1	1	0	0	15	1	0	0	15	20
1165	30	82	38	cesarean delivery	0	1	1	0	0	1	17.25	1	0.5	0	10	15
1166	29	76	38	cesarean delivery	1	2	1	0	0	1	15	1	0.5	6	10	20
1167	29	62.5	39	cesarean delivery	1	1	1	0	0	1	20.25	1	1	0	10	15
1168	31	66.7	40	cesarean delivery	0	1	1	0	0	0	18.75	1	0.5	6	10	15
1169	32	59	37	cesarean delivery	1	1	2	0	0	1	11	0	0	0	9	12
1170	29	75	40	cesarean delivery	1	2	1	0	0	1	18.75	1	0.5	0	10	15
1171	27	68	38	cesarean delivery	0	1	1	0	0	1	16.5	0	0	0	15	20
1172	34	70	39	cesarean delivery	0	1	1	0	0	1	16.5	1	0	0	16	21
1173	27	76.2	39	cesarean delivery	1	1	1	0	0	1	17.25	1	1	0	13	17
1174	39	70	39	cesarean delivery	0	2	1	1	0	1	11	0	0	0	10	14
1175	29	66	39	cesarean delivery	1	1	1	0	0	1	15.75	1	0	6	5	21
1176	28	82.5	33	cesarean delivery	1	3	1	0	0	1	17.25	1	0.5	0	4	7
1177	36	60	38	cesarean delivery	0	1	1	0	0	1	16.5	0	1	0	10	16
1178	29	65.2	37	cesarean delivery	1	3	1	0	0	0	16.5	0	0	0	13	16
1179	28	72.5	40	cesarean delivery	1	3	1	0	0	1	16.5	1	1	0	10	12
1180	27	54.7	37	cesarean delivery	0	3	1	0	0	0	17.25	0	0	0	13	16
1181	31	58	39	cesarean delivery	0	3	1	0	0	1	17.25	1	1	0	9	15
1182	40	72	39	cesarean delivery	0	3	1	1	1	1	15	1	0	0	17	23
1183	31	74.5	38	cesarean delivery	1	3	1	0	0	1	16.5	1	0.5	0	12	15
1184	30	76	39	cesarean delivery	0	3	1	0	0	1	15	1	0.5	0	15	20
1185	30	70	38	cesarean delivery	1	3	1	0	0	1	16.5	0	0	0	18	24
1186	34	72.5	35	cesarean delivery	0	1	1	0	0	1	12.5	0	0	0	15	20
1187	35	70	40	cesarean delivery	1	3	1	0	0	1	17.25	0	0	0	7	10
1188	32	86	39	cesarean delivery	1	1	1	0	0	1	16.5	1	0	0	15	25
1189	30	63.2	39	cesarean delivery	0	2	1	0	0	1	16.5	1	1	0	15	21
1190	34	59	34	cesarean delivery	1	1	1	0	0	1	15	1	0.5	0	10	15
1191	32	77	39	cesarean delivery	1	2	1	1	0	1	18.75	1	0.5	0	7	10
1192	30	57	39	cesarean delivery	0	3	1	0	0	1	15	1	0.5	0	15	23
1193	31	100	36	cesarean delivery	1	3	1	0	0	1	11	1	0	6	16	23
1194	23	66	38	cesarean delivery	0	3	1	0	0	1	16.5	1	0	0	6	11
1195	27	82	39	cesarean delivery	0	2	1	0	0	1	16.5	1	0	0	10	17
1196	27	82	39	cesarean delivery	0	2	1	0	0	1	16.5	0	0	0	10	18
1197	41	75	39	cesarean delivery	1	1	1	0	0	1	15	1	0.5	0	10	17
1198	27	72	39	cesarean delivery		3	1	0	0	1	17.25	1	0	0	13	16	Missing data
1199	31	75	39	cesarean delivery	0	1	1	0	0	1	19.5	1	1	0	8	18
1200	31	73.6	39	cesarean delivery	0	1	1	0	0	1	18	1	0.5	6	9	12
1201	36	76.4	39	cesarean delivery	0	1	1	0	0	1	19.5	1	0.5	0	9	14
1202	27	58.8	39	cesarean delivery	1	1	1	0	0	1	16.5	0	0	0	5	11
1203	32	54	39	cesarean delivery	1	2	1	0	0	1	16.5	1	0	0	5	10
1204	37	73	38	cesarean delivery	0	2	1	0	0	1	16.5	1	1	0	9	15
1205	24	62.1	40	cesarean delivery	1	2	1	0	0	1	16.5	1	0.5	0	10	16
1206	35	64.6	40	cesarean delivery	1	2	1	0	0	1	17.25	1	1	0	7	14
1207	32	63	39	cesarean delivery	0	2	1	0	0	1	16.5	0	0	6	10	18
1208	30	62.1	38	cesarean delivery	1	1	1	0	0	1	16.5	1	0	0	11	18
1209	29	55.6	41	cesarean delivery	1	1	1	0	0	1	16.5	1	1	0	10	13
1210	40	60	35	cesarean delivery	1	2	1	0	0	1	15	1	0.5	6	5	12
1211	25	76.5	40	cesarean delivery	1	1	1	0	0	1	16.5	1	1	0	10	15
1212	33	72	39	cesarean delivery	0	2	1	0	0	1	16.5	1	1	0	12	18
1213	35	59	39	cesarean delivery	1	1	1	0	0	1	16.5	1	0	0	10	15
1214	30	66	38	cesarean delivery	0	2	1	0	0	1	16.5	1	0	12	14	22
1215	25	77.9	39	cesarean delivery	1	3	1	0	0	1	18	1	1	0	14	20
1216	35	73	38	cesarean delivery	0	3	1	0	0	0	15	1	0	0	5	13
1217	31	68	38	cesarean delivery	0	1	1	0	0	1	15	1	0.5	0	10	22
1218	39	77	32	cesarean delivery	1	3	1	0	0	1	15.75	1	0	0	10	17
1219	32	66.3	38	cesarean delivery	1	3	1	0	0	0	16.5	0	0	0	5	9
